# pOpsicle: An all-optical reporter system for synaptic vesicle recycling combining pH-sensitive fluorescent proteins with optogenetic manipulation of neuronal activity

1 Marius Seidenthal<sup>1,2</sup>, Barbara Jánosi<sup>1,2</sup>, Nils Rosenkranz<sup>1,2</sup>, Noah Schuh<sup>1,2</sup>, Nora Elvers<sup>1,2</sup>,  
2 Miles Willoughby<sup>1,2</sup>, Xinda Zhao<sup>1,2</sup>, Alexander Gottschalk<sup>\*,1,2</sup>

3 <sup>1</sup> Buchmann Institute for Molecular Life Sciences, Goethe-University, Max-von-Laue-Strasse 15, D-  
4 60438 Frankfurt, Germany

5 <sup>2</sup> Institute for Biophysical Chemistry, Department of Biochemistry, Chemistry, and Pharmacy,  
6 Goethe-University, Max-von-Laue-Strasse 9, D-60438 Frankfurt, Germany

7 \* **Correspondence:**

8 Alexander Gottschalk

9 a.gottschalk@em.uni-frankfurt.de

10 **Keywords:** neurotransmission, exo-endocytosis, optogenetics, *Caenorhabditis elegans*, synaptic  
11 plasticity

12 **Abstract**

13 pH-sensitive fluorescent proteins are widely used to study synaptic vesicle (SV) fusion and recycling.  
14 When targeted to the lumen of SVs, fluorescence of these proteins is quenched by the acidic pH.  
15 Following SV fusion, they are exposed to extracellular neutral pH, resulting in a fluorescence increase.  
16 SV fusion, recycling and acidification can thus be tracked by tagging integral SV proteins with pH-  
17 sensitive proteins. Neurotransmission is generally stimulated by electrophysiology, which is not  
18 feasible in small, intact animals, thus limiting the approach to cell culture regimes. Previous *in vivo*  
19 approaches depended on distinct (sensory) stimuli, thus limiting the addressable neuron types. To  
20 overcome these limitations, we established an all-optical approach to stimulate and visualize SV fusion  
21 and recycling. We combined distinct pH-sensitive fluorescent proteins (inserted into the SV protein  
22 synaptogyrin) and light-gated channelrhodopsins (ChRs) for optical stimulation, overcoming optical  
23 crosstalk and thus enabling an all-optical approach. We generated two different variants of the pH-  
24 sensitive **optogenetic** reporter of vesicle recycling (pOpsicle) and tested them in cholinergic neurons  
25 of intact *Caenorhabditis elegans* nematodes. First, we combined the red fluorescent protein pHuji with  
26 the blue-light gated ChR2(H134R), and second, the green fluorescent pHluorin combined with the  
27 novel red-shifted ChR ChrimsonSA. In both cases, fluorescence increases were observed after optical  
28 stimulation. Increase and subsequent decline of fluorescence was affected by mutations of proteins  
29 involved in SV fusion and endocytosis. These results establish pOpsicle as a non-invasive, all-optical  
30 approach to investigate different steps of the SV cycle.

31 **1 Introduction**

32 Chemical synaptic transmission, the release of neurotransmitters into the synaptic cleft, depends on  
33 synaptic vesicle (SV) exocytosis (Sudhof, 2013). To efficiently sustain neurotransmitter release during  
34 phases of (high) neuronal activity, SV-associated proteins and lipids must be recycled from the plasma  
35 membrane, thus allowing to regenerate ready-to-release SVs (Gan and Watanabe, 2018; Chanaday et  
36 al., 2019). Several modes of SV recycling have been uncovered such as the classical clathrin-mediated

## Combining optogenetics with pH-sensitive fluorophores *in vivo*

37 endocytosis, activity-dependent bulk endocytosis, kiss-and-run release and the recently described  
38 ultrafast endocytosis (Heuser and Reese, 1973; Kittelmann et al., 2013; Watanabe et al., 2013a;  
39 Watanabe et al., 2013b; Morton et al., 2015; Watanabe and Boucrot, 2017; Shin et al., 2021). It is still  
40 under debate which of these processes happen under which conditions, and whether some of these  
41 represent short-cuts in the SV cycle, e.g. bypassing the endosome. Also, the exact involvement of  
42 known, and the discovery of novel, recycling factors mediating these events, is the subject of ongoing  
43 research (Gan and Watanabe, 2018; Yu et al., 2018). To study SV fusion and recycling, methods such  
44 as electron microscopy (EM), measurement of membrane capacitance and super-resolution microscopy  
45 are used. However, these methods are either limited in their temporal resolution (EM) or applicability  
46 to different neuronal cell types (membrane capacitance measurements and super-resolution  
47 microscopy) (von Gersdorff and Matthews, 1999; Yu et al., 2018; Shin et al., 2021).

48 Another method to indirectly visualize and quantify exocytosis and recycling of proteins is through  
49 tagging with pH-sensitive fluorescent proteins (Miesenbock et al., 1998). SVs must be acidified for  
50 refilling with neurotransmitters during the recycling process (Egashira et al., 2015; Gowrisankaran and  
51 Milosevic, 2020). For this reason, the fluorescence of pH-sensitive proteins, such as the green  
52 fluorescent pHluorin, when located on the intraluminal side of the SV membrane, is quenched by the  
53 low-pH environment (Sankaranarayanan et al., 2000). Upon SV fusion with the plasma membrane, the  
54 fluorescence increases due to exposure to the neutral extracellular medium and dequenching of the  
55 fluorophore (**Fig. 1A**). Subsequent to stimulation, the fluorescence decreases depending on the rate of  
56 endocytosis, sorting and reacidification of SVs. This way, positive or negative influences on the speed  
57 of SV retrieval can be quantified (Morton et al., 2015; Watanabe et al., 2018). Several variants of pH-  
58 sensitive fluorescent proteins have been created, covering almost the entire spectrum of visible light  
59 (Miesenbock et al., 1998; Shen et al., 2014; Liu et al., 2021). This opens the door for multiplexing with  
60 other fluorophores or optical actuators (Li and Tsien, 2012; Jackson and Burrone, 2016).

61 Most studies utilizing pH-sensitive fluorescent proteins in mammalian organisms are performed using  
62 cultured neurons (Watanabe et al., 2018). *In vivo* studies are rare and usually performed in translucent  
63 non-mammalian model systems such as *Danio rerio*, *Drosophila melanogaster* larvae, or  
64 *Caenorhabditis elegans* (Poskanzer et al., 2003; Koudelka et al., 2016; Ventimiglia and Bargmann,  
65 2017; Seitz and Rizzoli, 2019). Neurotransmission in these animals can be triggered by, however,  
66 labor-intensive and invasive electrophysiological stimulation. Alternatively, exposure to stimuli such  
67 as odors can be used. Yet, this is difficult to control, and limited to applications in sensory neurons  
68 (Choi et al., 2021). Thus, an all-optical solution that is not limited to certain cell types would be ideal,  
69 e.g., involving a combination of genetically encoded non-invasive tools for *in vivo* stimulation of  
70 neurons, with pH-sensitive fluorescent proteins. One possibility to manipulate neurotransmission is  
71 through transgenic expression of channelrhodopsins (ChRs), which are light-gated cation channels that  
72 can be used to depolarize neurons (Nagel et al., 2003; Boyden et al., 2005; Nagel et al., 2005; Liewald  
73 et al., 2008). Light absorption leads to isomerization of the chromophore all-*trans* retinal (ATR) and  
74 opening of the channel pore. A variety of ChRs that are activated by different wavelengths have been  
75 discovered or engineered (Guru et al., 2015; Chang, 2019). This enables multiplexing with both short-  
76 or long-wavelength absorbing fluorophores (Wabnig et al., 2015; Hawk et al., 2021; Vierock et al.,  
77 2021). In this work, we characterize two different combinations of ChRs with pH-sensitive fluorescent  
78 proteins in living *C. elegans* nematodes. We first tested pHuji, a recently described red fluorescent  
79 protein, together with the well described blue light-gated ChR2 (Nagel et al., 2005; Shen et al., 2014).  
80 This approach worked, however, not always robustly, thus we swapped both the actuator and the sensor  
81 to different excitation wavelengths. We used the recently described red-light activated ChR  
82 ChrimsonSA and the well-established green fluorescent pHluorin (Miesenbock et al., 1998; Oda et al.,  
83 2018; Seidenthal et al., 2022). Using this combination, we could stimulate and visualize SV exo- and

84 endocytosis in an all-optical, non-invasive manner *in vivo*. We termed this approach the pH-sensitive  
85 **optogenetic reporter of vesicle recycling (pOpsicle)**. We tested the pOpsicle method in cholinergic  
86 motor neurons and in the glutamatergic/tyraminergetic interneuron RIM. pOpsicle should be applicable  
87 to most neuronal cell types and is, to our knowledge, the only all-optical approach to study SV recycling  
88 using ChRs and pH-sensitive fluorescent proteins in living animals to date. Our approach expands the  
89 possibilities to study SV recycling at the *C. elegans* neuromuscular junction (NMJ) which previously  
90 could only be done by indirect measurement of postsynaptic effects using electrophysiology, Ca<sup>2+</sup>  
91 imaging, or by (non-)time-resolved electron microscopy (Liewald et al., 2008; Kittelmann et al., 2013;  
92 Wabnig et al., 2015; Steuer Costa et al., 2017; Yu et al., 2018).

## 93 **2 Materials and methods**

### 94 **2.1 Molecular biology**

95 For the expression of SNG-1 fusion constructs and channelrhodopsins in *C. elegans*, the *punc-17*  
96 promoter (cholinergic motor neurons) and a short version of the *ptdc-1* promoter (RIM interneurons)  
97 were used. **pcDNA3-SypHluorin 4x (S4x)** was a gift from Stephen Heinemann & Yongling Zhu  
98 (Addgene plasmid #37005; <http://n2t.net/addgene:37005>; RRID: Addgene\_37005). **pJB14** (*TOPO*  
99 *vector::2xpHluorin*) was generated using the TOPO cloning kit (Thermo Fisher Scientific Inc., USA)  
100 by amplifying two copies of pHluorin cDNA from the pcDNA3-SypHluorin 4x (S4x) plasmid with  
101 primers oBJ51 (5'-ATATCGAACCGTCTTCAGATATGGATCTAGCCACC-3') and oBJ62 (5'-  
102 TATATTCGCCGTCTTCTCCACCGCATGTGATTTCGAGCTCC-3'). **pJB10** (*punc-17::sng-1::unc-*  
103 *54-3'UTR*) was generated through Gibson assembly by digesting pRM348 with *BmtI* and *BsiWI* (*punc-*  
104 *17* and backbone), by amplifying pAG52 (*sng-1*) with primers oBJ58 (5'-  
105 TCAGGAGGACCCTTGGCTAGATGGAGAACGTGCGTGCTTATG-3') and oBJ59 (5'-  
106 ATGACTCGAGCTAATAACCATATCCTTCCGACTGAG-3') and by amplifying pAH03 (*unc-54-*  
107 *3'UTR*) with oBJ60 (5'-ATATGGTTATTAGCTCGAGTCATGGTCGACAAG-3') and oBJ61 (5'-  
108 AAACGCGCGAGACGAAAGGGCCCAAACAGTTATGTTTGGTATATTGGG-3'). **pJB11** (*punc-*  
109 *17::sng-1::2xpHluorin::unc-54-3'UTR*) was generated by digestion of pJB10 and pJB14 with *BbsI*  
110 and subsequent ligation to introduce two copies of pHluorin cDNA into the sequence encoding the first  
111 intraluminal loop of SNG-1. **pDisplay-pHuji** was a gift from Robert Campbell (Addgene plasmid  
112 #61556; <http://n2t.net/addgene:61556>; RRID: Addgene\_61556). pDisplay-pHuji was amplified using  
113 primers oBJ104 (5'-GCAGAAGAAAACCATGGGCTG-3') and oBJ105 (5'-  
114 CAGCCCATGGTTTTCTTCTGC-3') to remove the *BbsI* restriction site to generate **pJB24**. **pJB25**  
115 (*punc-17::sng-1::pHuji::unc-54-3'UTR*) was generated via Gibson assembly by digesting pJB10 with  
116 *BbsI* and amplifying pJB24 with primers oBJ107 (5'-  
117 ATATCGAAAAGTCTTCAGGTGGAGGTGGAAGTATGGTGAGCAAGGGCGAG-3') and  
118 oBJ108 (5'-TATATTCGCCGTCTTCGGTGGAGGTGGAAGTCTTGTACAGCTCGTCCATG-3')  
119 which contain the sequence for a GGGGS linker to add in front of the coding region of pHuji. **pJB26**  
120 (*punc-17::Chr2(HI34R)::myc*) was generated by amplifying *Chr2(HI34R)::myc* using primers  
121 oBJ113 (5'-GAACGCTAGCACCCTAGATCCATCTAGAG-3') and oBJ114 (5'-  
122 GCATGCTAGCCACCAGACAAGTTGGTAA-3') which was introduced into pRM348 by restriction  
123 digest with *NheI* and subsequent ligation. **pMSE01** (*punc-17::ChrimsonSA::unc-54-3'UTR*) was  
124 generated by amplifying pDV07 (*punc-17::ChrimsonWT::unc-54-3'UTR*) with oMSE16 (5'-  
125 CGAGTGGCTGCTGGCTTGCCCCGTGAT-3') and oMSE017 (5'-  
126 ATCACGGGGCAAGCCAGCAGCCACTCG-3') to introduce the point mutation (S169A). **pMSE23**  
127 (*ptdc-1s::ChrimsonSA::unc-54-3'UTR*) was generated by amplifying *ptdc-1s* from pXY07 (*ptdc-*  
128 *1s::GFP*) with primers oMSE105 (5'-

## Combining optogenetics with pH-sensitive fluorophores *in vivo*

129 TCCCGGCCGCCATGGCCGCGATTTCTGTATGAGCCGCCCG-3') and oMSE106 (5'-  
130 AAAGACTTTTCGATGAATTACTTGGGCGGTCCTGAAAAATG-3'), amplifying the ChrimsonSA  
131 backbone from pMSE01 with oMSE107 (5'-  
132 CATTTTTCAGGACCGCCCAAGTAATTCATCGAAAGTCTTTCTATTTCCGCATCTCTTGT  
133 CAAGGGATTGG-3') and oMSE108 (5'-  
134 CGGGCGGCTCATAACAGAAATCGCGGCCATGGCCGCCCG-3') and combined the fragments  
135 using Gibson assembly. pMSE24 (*ptdc-1s::sng-1::pHluorin::unc-54-3'UTR*) was generated by  
136 amplifying the *sng-1::pHluorin* backbone from pBJ11 with oMSE114 (5'-  
137 AGGGTCGACCATGACTCGAGCTAATAACCATATCCTTC-3') and oMSE115 (5'-  
138 GTAATTCATCGAAAGTCTTTCTATTTCCGCATCTCTTGTTC AAGGGATTGG-3') and with  
139 oMSE108 and oMSE113 (5'-GAAGGATATGGTTATTAGCTCGAGTCATGGTCGACCCT-3')  
140 and fusing these fragments with the *ptdc-1s* using Gibson assembly.

### 141 2.2 Cultivation of *C. elegans*

142 *C. elegans* strains were kept under standard conditions on nematode growth medium (NGM) plates  
143 seeded with the *Escherichia coli* strain OP50, obtained from the *Caenorhabditis* Genetics Center  
144 (CGC, University of Minnesota, USA), at 20°C (Brenner, 1974). The N2 Bristol strain was provided  
145 by the CGC and used as wild type. Transgenic animals were generated as described previously (Fire,  
146 1986). An overview of transgenic and mutant strains used or generated in this work can be found in  
147 Table 1. For experiments, well-fed L4 larvae were picked ~18 h before the assays. For RIM  
148 experiments, only animals showing marker fluorescence were used. Animals were supplemented with  
149 ATR (Sigma-Aldrich, USA) by adding 100 µl OP50 containing 200 µM ATR to 10 ml NGM agar  
150 dishes. Experiments were performed on at least two separate days with animals picked from different  
151 plates.

### 152 2.3 Measurement of *C. elegans* body length

153 Body length assays were performed as described previously (Liewald et al., 2008; Seidenthal et al.,  
154 2022). Briefly, ChR2(H134R) was activated using a 450-490 nm bandpass excitation filter at 1  
155 mW/mm<sup>2</sup> light intensity. ChrimsonSA was stimulated using light from a 50 W HBO lamp filtered  
156 through a 590-650 nm filter, and adjusted to 1 mW/mm<sup>2</sup> light intensity. Brightfield light was filtered  
157 with a 665-715 nm filter to avoid unwanted activation of channelrhodopsins. Videos of single animals  
158 were acquired and then analyzed using the WormRuler software (Seidenthal et al., 2022). Body length  
159 of each worm was normalized to the 5 s period before stimulation and values >120 % or < 80% of the  
160 initial body length were discarded as these are biomechanically impossible and result from artifacts in  
161 the background correction.

### 162 2.4 Measurement of crawling speed and reversals using the multi-work-tracker (MWT)

163 Videos of crawling animals were acquired as described previously (Vettkötter et al., 2022) and  
164 crawling speed measured using the MWT setup (Swierczek et al., 2011). Animals were washed three  
165 times with M9 buffer to remove OP50 bacteria. They were then transferred to unseeded NGM plates  
166 and kept in darkness for 15 minutes. A light stimulus was applied using a custom-build LED ring  
167 (Alustar 3W 30°, ledxon, 623 nm) which was controlled by an Arduino Uno (Arduino, Italy) device  
168 running a custom-written Arduino script. Videos were acquired using a high-resolution camera (Falcon  
169 4M30, DALSA) and crawling speed of single animals as well as reversal count (in bins of 10 s) were  
170 extracted using 'Choreography' software (Swierczek et al., 2011) and summarized using a custom  
171 Python script.

## 172 2.5 Microscopy and imaging

173 For fluorescence imaging, animals were placed upon 7 % agarose pads in M9 buffer. Animals were  
174 immobilized using a 20 mM Levamisole-hydrochloride (Sigma-Aldrich, USA) solution in M9 and  
175 visualized on an Axio Observer Z1 microscope (Zeiss, Germany) equipped with a 100 x oil objective.  
176 Fluorescent proteins and channelrhodopsins were excited using a 460 nm and a 590 nm LED system  
177 (Lumen 100, Prior Scientific, UK) coupled via a beamsplitter. pHuji and ChR2(H134R) were excited  
178 using a double band pass filter (460 – 500 nm, 570 – 600 nm) combined with a 605 nm beam splitter  
179 (AHF Analysentechnik, Germany). 460 nm LED light to stimulate ChR2(H134R) was set to 340  
180  $\mu\text{W}/\text{mm}^2$  intensity. pHuji fluorescence was filtered using a 615 – 680 nm emission filter and visualized  
181 using an EMCCD camera (Evolve 512 Delta, Teledyne Photometrics, USA). pHluorin and  
182 ChrimsonSA were excited using a 450 - 490 nm/ 555 – 590 nm double band pass filter combined with  
183 a GFP/mCherry beamsplitter (AHF Analysentechnik, Germany). 590 nm LED light intensity to  
184 stimulate ChrimsonSA was set to 40  $\mu\text{W}/\text{mm}^2$ . pHluorin fluorescence was filtered using a 502.5 –  
185 537.5 nm band pass emission filter and visualized using a sCMOS camera (Kinetix 22, Teledyne  
186 Photometrics, USA). The dorsal nerve cord (DNC) was visualized using the basal pHuji or pHluorin  
187 fluorescence. For cholinergic neurons, the a region in the posterior third of the animal was imaged,  
188 where an abundance of synaptic puncta can be found. For RIM experiments, fluorescent neuronal  
189 extensions in the head region were visualized. Videos were captured using the  $\mu$ Manager v.1.4.22  
190 software (Edelstein et al., 2014). pHuji - pOpsicle experiments were performed with 50 ms exposure  
191 time, pHluorin - pOpsicle experiments with 200 ms exposure. Stimulation of channelrhodopsins was  
192 triggered using a custom written *Autohotkey* script to activate and deactivate LEDs. Representative  
193 images displaying entire worms were acquired using a 40 x oil objective and stitched together using  
194 the ImageJ *Stitching* Plugin (Preibisch et al., 2009). The representative image of RIM neurons (**Fig.**  
195 **6A**) was made using the *Z Project* function to generate a projection of slices acquired throughout the  
196 head region.

## 197 2.6 Quantification of fluorescence

198 Example images were processed, and fluorescence was quantified using ImageJ v1.53 (Schindelin et  
199 al., 2012). A region of interest (ROI) was placed on the DNC or RIM neuron using the *Segmented Line*  
200 tool. Pixel width of the line was adjusted according to the width of the fluorescent signal. A background  
201 ROI was set in close proximity to the imaging ROI, inside the worm (but avoiding gut  
202 autofluorescence) and fluorescence was quantified using the *Multi Measure* function. XY-drift was  
203 corrected using the *Template Matching* ImageJ plugin, if necessary. Animals that moved excessively  
204 or drifted in the focal plane were discarded. Fluorescence was normalized to the average fluorescence  
205 before stimulation ( $F_0$ ) to compare different animals:

206

207

$$\frac{\Delta F}{F_0} = \frac{F - F_0}{F_0}$$

208 A custom written python script was used for background subtraction, normalization and (if needed)  
209 filtering of animals according to whether they show a strong response during stimulation (available on  
210 GitHub<sup>1</sup>). For this, the maximum background corrected fluorescence during stimulation was calculated  
211 (as a moving average of 1 s). If this was higher than the average background corrected fluorescence

---

<sup>1</sup> [https://github.com/MariusSeidenthal/pHluorin\\_Imaging\\_Analysis](https://github.com/MariusSeidenthal/pHluorin_Imaging_Analysis)

212 before the stimulation + 3 \* standard deviation (of background corrected fluorescence before  
213 stimulation), the animal was counted as a strong responder (adapted from Choi et al., 2021); see **Fig.**  
214 **S3A** for example traces that fit or do not fit these parameters; animals not fitting the cut-off showed no  
215 discernable light-evoked effect on DNC fluorescence. Also, animals that showed an increase of the  
216 fluorescence after the end of the stimulus, or animals showing spontaneous events, were excluded.  
217 These measures were necessary for the calculation of fluorescence rise and decay kinetics, since data  
218 from ‘non-responders’ could not be properly fitted. Fluorescence was not corrected for bleaching since  
219 the measured background fluorescence bleached with a similar rate as the fluorescence in the DNC.  
220 Thus, subtraction of background fluorescence was sufficient to correct for bleaching. Attempts to  
221 further correct for bleaching led to a progressive deviation towards the end of the acquisition.  
222 Fluorescence signal increases in the pOpsicle assay were calculated using the mean of the normalized  
223 fluorescence at the first second after stimulation ( $\pm$  SEM) for pHuji experiments or the mean of seconds  
224 15 to 20 ( $\pm$  SEM) for pHluorin experiments. Regression analysis, to calculate the rate of fluorescence  
225 rise and decay, was performed using Graphpad Prism 9.4.1. One-phase exponential association (1) and  
226 decay (2) equations were fitted to the timepoints during and after stimulation and the time constants  $\tau$   
227 calculated for each animal:

228 
$$(1) f(t) = f_0 + (Plateau - f_0) * (1 - e^{-\frac{t}{\tau}})$$

229 
$$(2) f(t) = (f_0 - Plateau) * e^{-\frac{t}{\tau}} + Plateau$$

230 t: time (in seconds)

231  $f_0$ : value of  $f(t)$  at  $t = 0$

232 Plateau: value of  $f(t)$  at  $t = \infty$

233  $\tau$ : time constant (in seconds; higher  $\tau$  values indicate a slower rise or decay)

234 As above, each fit was inspected. Individual fits that showed no increase during stimulation were  
235 discarded from analysis as they could not be fitted properly (**Fig. S3A**). Similarly, data sets that displayed  
236 an increase rather than a decay after stimulation were also discarded.

## 237 **2.7 *C. elegans* Primary neuronal cell culture**

238 For the preparation of *C. elegans* primary cell culture, established protocols were adapted and modified  
239 (Christensen et al., 2002; Strange et al., 2007). Gravid adult worms were grown on enriched peptone  
240 plates with nystatin (NEP agar) seeded with Na22 *E. coli* (CGC; Zhang et al., 2011). Worms were  
241 washed off the plate using double-distilled water (ddH<sub>2</sub>O) and transferred to 15 ml centrifuge tubes.  
242 2 ml of household bleach as well as 1 ml of 5 M NaOH solution were added to 7 ml of worm  
243 suspension. The solution was vortexed for at least five minutes at maximum speed to get rid of adult  
244 worm bodies. All the following steps were performed under a sterile workbench. The solution, now  
245 containing only eggs, was centrifuged at 500 g for one minute. Excess liquid was removed, and the  
246 pellet was resuspended in ddH<sub>2</sub>O. Washing was repeated three times. The egg pellet was resuspended  
247 in 500  $\mu$ l freshly thawed chitinase (1 U/ml, Sigma-Aldrich, USA) and transferred to a 1.5 ml tube. The  
248 tube was placed into a shaker for 90 minutes at room temperature to digest the chitin shell of the eggs.  
249 The chitinase reaction was stopped with 800  $\mu$ l L-15 full medium (Gibco, USA) containing 10 % fetal  
250 calf serum (FCS) as well as Pen/Strep (50 U/ml penicillin + 50  $\mu$ g/ml streptomycin; Sigma-Aldrich,  
251 USA). After centrifugation at 900 g, excess liquid was discarded, and the pellet was resuspended in

252 500  $\mu$ l L-15 full medium. Using a 2 ml syringe with an 18-gauge needle, the solution was aspirated  
253 and released back into the tube 15 to 20 times to dissociate the cells. After dissociation, 1 ml L-15 full  
254 medium was added to the tube and taken up into the syringe. With the cell solution inside the syringe,  
255 the needle was replaced by a 5  $\mu$ m filter (Millipore, Germany). The solution was released through the  
256 filter into a fresh tube. The original tube was refilled with 1 ml L-15 full medium, the filter was replaced  
257 by the needle and the procedure was repeated to release the solution into another tube. This was  
258 repeated four to six times, depending on the initial number of eggs (more eggs = less repetitions).  
259 Filtered cell solutions were centrifuged at 900 g and most of the supernatant was discarded. Cell pellets  
260 were resuspended in the remaining medium and pooled. 500 to 1000  $\mu$ l L-15 full medium were added  
261 to the suspension and the solution was seeded on 1 - 2 peanut lectin (Sigma-Aldrich, USA) coated glass  
262 bottom petri dishes (ibidi, Germany). Petri dishes were filled with 1 ml L-15 full medium and cells  
263 were allowed to adhere for 24 hours in a 20 °C sterile incubator (Memmert, Germany) before  
264 exchanging the medium. Treatment with ATR was performed after two days. Medium was replaced  
265 with a 10  $\mu$ M ATR solution in L15 full medium and the cells incubated for at least 12 h at 20 °C. Prior  
266 to measurement, cells were washed two times with L-15 full medium without ATR. Neurons were  
267 imaged three to four days after seeding. The filter setup was identical to the one used to visualize  
268 pHluorin in whole animals, yet neurons were visualized using a 40 x objective. Buffers used to either  
269 de-quench or quench pHluorin fluorescence were adapted from Dittman and Kaplan (2006) and added  
270 manually by pipetting 1 ml of the respective solution onto the petri dish and then removing the same  
271 amount of liquid. Before starting a new acquisition, cells were washed three times using the control  
272 saline buffer (pH 7.4). Fluorescence was quantified as in living animals. A ROI was set on top of  
273 neurite extensions using the ImageJ “Segmented line” tool with a background ROI set in proximity.

## 274 **2.8 Statistical Analysis**

275 Statistical analysis and plotting of graphs were done using Graphpad Prism 9.4.1. Unpaired *t*-Tests  
276 were performed if two normally distributed datasets were compared or one-way ANOVAs using the  
277 Dunnett’s correction for multiple comparisons for three or more datasets. Fluorescence rise and decay  
278 constants were compared using the Mann-Whitney test (for two datasets) or the Kruskal-Wallis tests  
279 with Dunn’s correction for multiple comparisons (three or more datasets).

## 280 **3 Results**

### 281 **3.1 Stimulation of neurotransmission using ChR2 triggers fusion of SVs containing** 282 **synaptogyrin-pHuji**

283 To enable an all-optical method for analysis of SV exo- and endocytosis, we used proteins with  
284 presumably low optical crosstalk. Specifically, we tested the recently described red fluorescent pHuji  
285 protein which shows a 22-fold increase of fluorescence when transferred from intravesicular to  
286 extracellular pH (Shen et al., 2014). pHuji was combined with the blue light-gated ChR2(H134R;  
287 hereafter called ChR2) for stimulation of neurotransmission (Nagel et al., 2005). The spectral overlap  
288 of the excitation spectra of pHuji and ChR2 is minimal (Azimi Hashemi et al., 2014; Shen et al., 2014;  
289 Lambert, 2019; **Fig. 1B**). To use pH-sensitive proteins as reporters for exo- and endocytosis, they must  
290 be targeted to the acidic intraluminal side of the SV membrane (Miesenbock et al., 1998; Ventimiglia  
291 and Bargmann, 2017; Li et al., 2022). Typically, the utilized reporters are either fused to the vesicular  
292 glutamate transporter or inserted into loops of the tetraspan membrane protein synaptophysin  
293 (Voglmaier et al., 2006; Luo et al., 2021). Since in *C. elegans* proteins can be targeted to e.g.  
294 cholinergic or GABAergic motor neurons using specific promoters, we chose the ubiquitous (in  
295 neurons) integral SV membrane protein synaptogyrin-1 (SNG-1), which is closely related to

296 synaptophysin (however, *C. elegans* SPH-1 is not expressed in neurons), to target pH-sensitive  
297 fluorescent proteins (Zhao and Nonet, 2001; Abraham et al., 2006). SNG-1 has previously been used  
298 to target proteins to SVs (Liu et al., 2019; Vettkötter et al., 2022). We inserted pHuji into the second  
299 intraluminal loop of SNG-1, which should expose it to the acidic inside of SVs (**Fig. 1A**). This construct  
300 was co-expressed with ChR2 in cholinergic motor neurons using the promotor of *unc-17* which encodes  
301 the vesicular acetylcholine transporter (Alfonso et al., 1993; Miller et al., 1996; Liewald et al., 2008).  
302 SNG-1::pHuji could be observed throughout the entire cholinergic nervous system, including the nerve  
303 ring, as well as the ventral and dorsal nerve cords (VNC/DNC; **Fig. 1C**). It also localizes to neuronal  
304 extensions of cholinergic DA and DB neurons innervating dorsal muscle cells (**Fig. 1D**). Fluorescent  
305 puncta in the DNC indicate accumulation of SNG-1::pHuji at NMJs (Sieburth et al., 2005). Next, we  
306 analyzed whether neurotransmission can be activated in these animals using ChR2. Stimulation of  
307 cholinergic motor neurons leads to a reduction in body length through acetylcholine release which  
308 activates muscle cell contraction (Liewald et al., 2008). This was the case, as blue light caused a  
309 decrease of body length in animals that were grown in the presence of *all-trans retinal* (ATR; **Fig. 1E**),  
310 while controls without ATR did not alter their body length upon illumination. We therefore  
311 investigated whether stimulation of cholinergic motor neurons leads to exocytosis and thus to an  
312 increase in the fluorescence of SNG-1::pHuji. pHuji fluorescence was quantified in the DNC towards  
313 the posterior part of the animal due to the abundance of NMJs in this body region (Sieburth et al., 2005;  
314 **Fig. 1D, F**). Since pHuji fluorescence was relatively dim, we were unable to quantify fluorescence  
315 during the stimulation period: Blue light increased the autofluorescence within the animal, thus  
316 erroneously increasing the measured pHuji signal. Alternating light protocols also failed, likely due to  
317 the photoswitching nature of pHuji (Liu et al., 2021). However, it was possible to compare the  
318 fluorescence before and after stimulation. Animals treated with ATR showed a significantly increased  
319 fluorescence after stimulation ( $19 \pm 3 \% \Delta F/F_0$ ), compared to animals without ATR ( $2 \pm 2 \%$ , \*\*\* $p <$   
320  $0.001$ ; **Fig. 1F**). This increase gradually declined towards the fluorescence level in animals grown  
321 without ATR. The decline is most likely an indicator for recycling of externalized SNG-1::pHuji (and  
322 thus of SVs). We termed the pHuji-ChR2 combination ‘red pOpsicle’.

### 323 3.2 pHuji fluorescent signal increase is an indicator for SV exocytosis

324 To determine whether the pOpsicle assay is capable of efficiently reporting SV exo- and endocytosis,  
325 we crossed the ChR2 and SNG-1::pHuji expressing transgene into mutants known to affect proteins  
326 involved in the SV cycle (**Fig. 2**). Synaptobrevin-1 (SNB-1) is an essential vesicular soluble N-  
327 ethylmaleimide-sensitive-factor attachment receptor (v-SNARE) and thus involved in SV fusion with  
328 the plasma membrane at active zones (Nonet et al., 1998; Liu et al., 2018). Reduction-of-function  
329 mutants show reduced acetylcholine release and post-synaptic currents (Nonet et al., 1998). In  
330 comparison to wild type animals, *snb-1(md247)* mutant animals showed a significantly lower  
331 fluorescence increase after stimulation with blue light (wild type:  $15 \pm 2 \%$ , *snb-1(md247)*:  $2 \pm 2 \%$ ;  
332 **Fig. 2A, B**), as expected, because lower amounts of SVs containing SNG-1::pHuji are exocytosed due  
333 to the defective SNARE complex. Next, we examined whether the rate of the fluorescence decay after  
334 stimulation depended on the rate of SV recycling. We thus crossed the pHuji expressing transgene into  
335 mutants lacking the established SV recycling factors synaptojanin-1/UNC-26, endophilin-1/UNC-57  
336 and synaptotagmin-1/SNT-1. These proteins are involved in numerous processes at different steps in  
337 SV recycling, such as membrane bending and clathrin-uncoating (Jorgensen et al., 1995; Harris et al.,  
338 2000; Schuske et al., 2003; Kittelmann et al., 2013; Watanabe et al., 2018; Yu et al., 2018; Mochida,  
339 2022). Notably, SNT-1 is also the primary sensor of calcium for exocytosis but independent from this  
340 also regulates endocytosis, as an adapter complex 2 (AP2) binding site in the plasma membrane  
341 (Poskanzer et al., 2003; Yu et al., 2013; Mochida, 2022). Both, *unc-26(s1710)* and *unc-57(e406)*  
342 knockout mutants, displayed a higher increase in pHuji fluorescence than wild type animals (**Fig. 2C**:



343 wild type  $16 \pm 3$  %, *unc-26(s1710)*  $30 \pm 5$  %, \* $p < 0.05$ ; **Fig. 2D**: wild type  $16 \pm 3$  %, *unc-57(e406)*  
344  $30 \pm 4$  %, \* $p < 0.05$ ). This was surprising since both mutants were previously shown to be depleted of  
345 ready-to-release SVs and should therefore not be able to externalize as many SVs as wild type animals  
346 (Harris et al., 2000; Schuske et al., 2003). Possibly, this could be due to reduced recycling during the  
347 stimulation period, thus leading to an accumulation of SNG-1 on the plasma membrane. Nevertheless,  
348 both mutants showed prolonged increased fluorescence during acquisition compared to wild type. *snt-*  
349 *1(md290)* knockout mutants displayed a similar signal increase and decay trend as wild type (**Fig. 2E**:  
350 wild type  $14 \pm 3$  %, *snt-1(md290)*  $20 \pm 3$  %, ns  $p > 0.05$ ). We calculated the kinetics of fluorescence  
351 decay after stimulation using a one-phase exponential decay model (**Fig. 2F - H**). As no significant  
352 difference in the rate of the fluorescence decay was observed, we wondered if the pHuji/ChR2  
353 combination works properly. One concern was that pHuji exhibits photo-switching behavior in blue  
354 light, as previously shown (Liu et al., 2021). This might explain the slight increase in fluorescence in  
355 animals without ATR after stimulation and could also influence the decay kinetics of animals with  
356 ATR (**Fig. 1F**). We thus investigated other possible protein combinations to achieve more accurate  
357 measurements of recycling kinetics using the pOpsicle assay.

### 358 3.3 Improving pOpsicle through combination of pHluorin with ChrimsonSA

359 We tested the more commonly used green fluorescent pHluorin as a pH-sensitive fluorophore which  
360 moreover features brighter fluorescence (Miesenbock et al., 1998; Li et al., 2022). Since pHluorin has  
361 overlapping excitation spectra with ChR2, we needed to exchange ChR2 with a red light activated  
362 channelrhodopsin. The recently described ChrimsonSA (for super red-shifted and accelerated), which  
363 is a mutated variant (S169A) of Chrimson, seemed to be a suitable candidate (Oda et al., 2018).  
364 Previously, we could show that ChrimsonSA can be used to depolarize *C. elegans* motor neurons upon  
365 stimulation with red light (Seidenthal et al., 2022; **Fig. 3A**). Two copies of pHluorin were inserted into  
366 the second intraluminal loop of SNG-1 as multiple pHluorin insertions have been shown to increase  
367 the signal-to-noise ratio (Zhu et al., 2009). We co-expressed this fusion construct with ChrimsonSA in  
368 cholinergic motor neurons and observed basal pHluorin fluorescence throughout the cholinergic  
369 nervous system (**Fig. 3B**). SNG-1::pHluorin also localizes to neuronal extensions of DA and DB  
370 neurons innervating dorsal muscle cells (**Fig. 3C**). Fluorescent puncta in the DNC indicate an  
371 accumulation of pHluorin at NMJs. To show that this fluorescence is indeed pH-dependent, we  
372 generated neurons as primary cell cultures from dissociated *C. elegans* embryos. pHluorin fluorescence  
373 could be observed in neurite extensions and around nuclei (**Fig. S1A, B**). Buffers containing  
374 ammonium chloride ( $\text{NH}_4\text{Cl}$ ), can be used to increase the pH within SVs (Sankaranarayanan et al.,  
375 2000; Dittman and Kaplan, 2006). When exposed to such a buffer, pHluorin fluorescence in neurites  
376 rapidly increased (**Fig. 3D** and **Fig. S1C**). The same culture was then treated with a low pH buffer to  
377 quench the surface fraction of pHluorin (**Fig. 3D** and **Fig. S1D**). The fluorescence immediately  
378 decreased to levels below the basal fluorescence. Washing of cells with a neutral-pH buffer then slowly  
379 increased the fluorescence again, showing the dependency of the green fluorescence on the surrounding  
380 pH. Animals expressing pHluorin and ChrimsonSA showed light dependent contraction of muscle cells  
381 in red light when treated with ATR (**Fig. 3E**). This indicates that ChrimsonSA is functioning properly  
382 to depolarize cholinergic motor neurons. Next, we performed pOpsicle assays with pHluorin animals  
383 ('green pOpsicle'). DNC fluorescence gradually increased by  $21 \pm 2$  % upon continuous 590 nm  
384 stimulation in ATR-treated animals (**Fig. 3F - I**, see **Fig. S1E** for a representation of all experiments,  
385 and **Supplementary Movie 1**). The signal reached a plateau after  $\sim 10$  s, indicating that most SNG-  
386 1::pHluorin was externalized at this point. Animals without ATR showed no increase upon stimulation  
387 ( $0 \pm 1$  %, \*\*\* $p < 0.001$ ; **Fig. 3H, I**). The increase in fluorescence was especially high in synaptic puncta  
388 along the DNC, indicating locations of highly active SV release sites (**Fig. 3F, G**). Following the end

389 of the stimulation, like in red pOpsicle experiments, the signal gradually decreased towards levels  
390 before stimulation. Cultured neurons expressing pHluorin also showed a rise in fluorescence when  
391 illuminated (and when treated with ATR) even though the signal size was lower and only a fraction of  
392 the neurons showed a significant increase (**Fig. S1F**). Only 18 of 52 neurons showed a strong response,  
393 in contrast to intact animals, where this was the case for each individual recording (**Fig. 3I** and **Fig.**  
394 **S1E**; for a definition of “strong response”, see *Methods*). Furthermore, we observed spontaneous  
395 pHluorin increases in some animals, independent of treatment with ATR or illumination with red light  
396 (**Fig. S1G**).

### 397 **3.4 Quantification of SV exo- and endocytosis kinetics by the pHluorin pOpsicle assay**

398 Next, we used green pOpsicle to analyze mutants affecting SV fusion (*snb-1(md247)*, *snt-1(md290)*)  
399 and/or recycling (*unc-26(s1710)*, *unc-57(e406)*, *snt-1(md290)*) (**Fig. 4**). In *snb-1(md247)* mutants, the  
400 signal increase during stimulation was almost completely abolished (**Fig. 4A, B** and **Fig. S2A**). Only  
401 2 of 19 animals showed a relevant response (compared to 23/23 in wild type), demonstrating that the  
402 increase of fluorescence during stimulation reports on SV exocytosis. Synaptojanin-1 (*unc-26(s1710)*)  
403 mutant animals also exhibited a reduced signal compared to wild type (**Fig. 4C, D** and **Fig. S2B**). Thus,  
404 green pOpsicle faithfully revealed the expected depletion of SVs in *unc-26(s1710)* mutants (Harris et  
405 al., 2000), unlike pHuji that displayed a higher fluorescence after stimulation (**Fig. 2C**). To allow  
406 calculating the kinetics of fluorescence rise and decay, animals which showed no significant increase  
407 in fluorescence or no decay after stimulation had to be removed from analysis (**Fig. S3A**). We observed  
408 a significantly slower rise of fluorescence in *unc-26(s1710)* mutant compared to wild type animals, as  
409 could be seen by the increased time constants of the signal curves obtained from single animals, when  
410 fitted to a one-phase exponential association kinetic ( $\tau_{\text{Rise, wild type}} = 2.2$  s,  $\tau_{\text{Rise, unc-26}} = 5.1$  s; **Fig. 4E**).  
411 This could indicate an exocytosis defect, or it could be due to the reduced number of SVs that are  
412 available for fusion in the *unc-26(s1710)* mutant. The kinetics of the fluorescence decay after  
413 stimulation showed a strong reduction, as expected for the SV recycling mutant (**Fig. 4F, G**).  
414 Consequently, the calculated time constants of one-phase exponential decay were significantly  
415 increased in *unc-26(s1710)* mutants ( $\tau_{\text{Decay, wild type}} = 16.0$  s,  $\tau_{\text{Decay, unc-26}} = 44.8$  s), closely matching  
416 previous results measured in mammalian synaptojanin-1 knockout neurons (Watanabe et al., 2018).  
417 Wild type animals on the other hand showed decay time constants which are in the range of previous  
418 measurements in *C. elegans* sensory neurons, *Drosophila* motor neurons or mammalian hippocampal  
419 neurons (Ventimiglia and Bargmann, 2017; Yao et al., 2017; Li et al., 2022). Endophilin-1 (*unc-*  
420 *57(e406)*) mutants show similar trends as *unc-26(s1710)* with a significantly reduced signal and  
421 significantly slower association and decay kinetics compared to wild type ( $\tau_{\text{Rise, wild type}} = 2.5$  s,  $\tau_{\text{Rise, unc-}}$   
422  $57 = 3.1$  s,  $\tau_{\text{Decay, wild type}} = 10.7$  s,  $\tau_{\text{Decay, unc-57}} = 25.4$  s; **Fig. 4H – L** and **Fig. S2C**). However, the *unc-*  
423 *57(e406)* mutant phenotype seemed to be less severe than in *unc-26(s1710)* mutants in all aspects,  
424 which supports previous findings using optogenetic stimulation combined with electron microscopy  
425 (Kittelman et al., 2013). Synaptotagmin-1 (*snt-1(md290)*) mutants also displayed a smaller increase  
426 in fluorescence (**Fig. 4M, N** and **Fig. S2D**). The time constants of fluorescence rise are significantly  
427 increased in mutant animals ( $\tau_{\text{Rise, wild type}} = 2.7$  s,  $\tau_{\text{Rise, snt-1}} = 5.7$  s; **Fig. 4O**), demonstrating the role of  
428 SNT-1 in SV fusion (Liewald et al., 2008; Yu et al., 2013). We further observed a significantly delayed  
429 decrease of fluorescence after stimulation, indicating that SNT-1 is involved in SV recycling at *C.*  
430 *elegans* NMJs (Poskanzer et al., 2003; Mochida, 2022;  $\tau_{\text{Decay, wild type}} = 7.9$  s,  $\tau_{\text{Decay, snt-1}} = 43.5$  s; **Fig. 4P,**  
431 **Q**). Since the increase in fluorescent signal was generally lower in mutant animals, we wondered  
432 whether higher time constants of decay were caused by a lower activation of synaptic transmission  
433 rather than decreased SV recycling rates. We thus compared decay time constants of individual animals  
434 with the respective signal size. However, there was no significant correlation within any of the analyzed

435 genotypes (**Fig. S3B – D**). Therefore, recycling rates likely do not depend on the amount of SV fusion  
436 in this assay.

### 437 3.5 Pulsed stimulation to potentially access different recycling mechanisms

438 Continuous photostimulation induces maximal depolarization and transmitter release, likely causing  
439 bulk endocytosis as the extreme form of ultrafast endocytosis (Kittelmann et al., 2013). To assess  
440 whether less vigorous, possibly more physiological activation also affects slower recycling, we applied  
441 2 Hz pulsed stimulation (100 ms light pulses; **Fig. 5**). The mutant strains again showed significantly  
442 reduced signal amplitudes compared to wild type (**Fig. 5A, B** and **Fig. S4**). *unc-26(s1710)* and *unc-*  
443 *57(e406)* mutants also showed significantly increased time constants of fluorescence rise ( $\tau_{\text{Rise, wild type}}$   
444  $= 5.4$  s,  $\tau_{\text{Rise, unc-26}} = 21.3$  s,  $\tau_{\text{Rise, unc-57}} = 10.1$  s,  $\tau_{\text{Rise, snt-1}} = 7.2$  s; **Fig. 5C**). When comparing pulsed and  
445 continuous stimulation we observed a tendency towards decreased fluorescence amplitudes and  
446 increased rise time constants, indicating that pulsed stimulation leads to a reduced activation of  
447 neurotransmission (**Fig. S5A, B**). For the recycling phase, pulsed stimulation again resulted in  
448 significantly larger decay time constants in *unc-57(e406)* and *unc-26(s1710)* mutants compared to wild  
449 type ( $\tau_{\text{Decay, wild type}} = 11.3$  s,  $\tau_{\text{Decay, unc-26}} = 51144$  s,  $\tau_{\text{Decay, unc-57}} = 203.9$  s; **Fig. 5D, E**), however, *snt-*  
450 *1(md290)* mutant animals showed no significant difference ( $\tau_{\text{Decay, snt-1}} = 79.3$  s). Possibly, SNT-1 is  
451 dispensable for recycling at lower levels of stimulation. Decay time constants for pulsed stimulation  
452 were not significantly different than for continuous stimulation, apart from *unc-57* mutants (**Fig. S5C**).

### 453 3.6 pOpsicle reports on SV turnover in the single pair of RIM interneurons

454 While the green pOpsicle assay worked well in cholinergic motor neurons, it remained to be shown  
455 that this system works in other neuronal cell types. The RIM interneuron pair integrates signals from  
456 sensory neurons to regulate forward and reversal locomotion, using gap junctions as well as glutamate  
457 and tyramine signaling (Piggott et al., 2011; Li et al., 2020; Sordillo and Bargmann, 2021). We  
458 expressed SNG-1::pHluorin and ChrimsonSA in RIM using the *tdc-1* promotor. Green fluorescence  
459 could be observed in neuronal extensions surrounding the pharynx, suggesting correct localization of  
460 SNG-1::pHluorin (**Fig. 6A**). To explore ChrimsonSA functionality in this neuron pair, we measured  
461 animal crawling speed (**Fig. 6B**). Optogenetic depolarization of RIM neurons previously induced  
462 reversals and reduced crawling speed (Guo et al., 2009; Li et al., 2020; Sordillo and Bargmann, 2021).  
463 Consistently, illumination with red light slowed down crawling speed of RIM pOpsicle animals treated  
464 with ATR (**Fig. 6C**), while the number of reversals was increased. This indicated that ChrimsonSA  
465 depolarized RIM neurons when activated. Consequently, SNG-1::pHluorin fluorescence in synaptic  
466 puncta was significantly increased by ChrimsonSA activation (**Fig. 6D, E, Fig. S6** and **Supplementary**  
467 **Movie 2**), while control animals without ATR showed no change (+ATR  $6 \pm 2$  %, -ATR  $-1 \pm 1$  %,   
468  $***p < 0.001$ ; **Fig. 6F**). The signal increase was significantly slower than in cholinergic neurons ( $\tau_{\text{Rise,}}$   
469  $\tau_{\text{Rise, RIM}} = 5.9$  s,  $\tau_{\text{Rise, cholinergic}} = 2.3$  s; **Fig. 6G, H**), as was the decay of fluorescence following the end of  
470 stimulation ( $\tau_{\text{Decay, RIM}} = 47.7$  s,  $\tau_{\text{Decay, cholinergic}} = 13.0$  s; **Fig. 6I, J**). These results indicate that different  
471 classes of neurons may have diverging kinetics of SV exo- and endocytosis in *C. elegans*. Thus, the  
472 pOpsicle assay can be adapted to different neuronal cell types.

## 473 4 Discussion

474 Here, we present the first all-optical method to investigate SV recycling *in vivo* by combining pH-  
475 sensitive fluorescent proteins with ChRs. With pOpsicle, factors that influence the extent and rate of  
476 exo- and endocytosis can be investigated with minor experimental effort and equipment. We described  
477 two approaches using different pH-sensitive fluorescent proteins. pHuji could only be used to quantify

## Combining optogenetics with pH-sensitive fluorophores *in vivo*

478 the extent of exocytosis after stimulation. The low quantum yield and photoswitching behavior of this  
479 protein influenced the emitted fluorescence in a way that precluded quantification of exo- and  
480 endocytosis kinetics (Shen et al., 2014; Liu et al., 2021). Using pHluorin and ChromsonSA, however,  
481 solved these problems, enabling calculation of fluorescence rise and decay time constants, which  
482 characterize different rates of exo- and endocytosis (Li et al., 2022). Neuronal primary culture of  
483 pHluorin expressing neurons could further open the way for investigation of exocytosis independent  
484 of SV recycling, e.g., by applying pharmacological agents such as bafilomycin A to inhibit SV  
485 acidification (Subramanian and Morozov, 2011; Li et al., 2022).

486 The pOpsicle system should be applicable to various neuronal cell types with minor modifications as  
487 exemplified by expression in cholinergic neurons and RIM interneurons. Establishing pOpsicle in  
488 various cell types could unveil disparities in SV exo- and endocytosis between different neuron classes,  
489 as has been shown for sensory neurons in *C. elegans* (Ventimiglia and Bargmann, 2017). Hitherto,  
490 electrophysiological recordings or Ca<sup>2+</sup> imaging in body wall muscles were the method of choice to  
491 quantify neurotransmitter release in *C. elegans* in a time-resolved manner (Liewald et al., 2008;  
492 Wabnig et al., 2015). However, these only report postsynaptic effects which might be altered by  
493 unrelated phenomena such as neurotransmitter-receptor upregulation (Hammond-Weinberger et al.,  
494 2020). By using pOpsicle, a direct observation of the presynaptic SV cycle was achieved. This way,  
495 we could observe slowed SV fusion and endocytosis in RIM interneurons compared to cholinergic  
496 motor neurons. The faster release and recycling in cholinergic neurons may be in line with their  
497 function in mediating locomotion, and the likely high SV turnover needed, while the slower release  
498 rate could be important to the dual role of RIM in regulating reversal behavior (Li et al., 2020; Sordillo  
499 and Bargmann, 2021). While RIM promotes reversals through activation of AVA and AVE neurons  
500 via gap junctions, glutamate signaling inhibits reversal probability by reducing the amplitude of Ca<sup>2+</sup>  
501 spikes within AVA and AVE (Li et al., 2020). A delayed release of glutamate from RIM may thus  
502 promote a fast reaction to noxious stimuli by initiation of reversals. Observation of pHluorin dynamics  
503 in freely moving worms may solve this issue. However, we note that it was imperative for the assay to  
504 work that the animals were kept as immobile as possible.

505 With green pOpsicle, we could reveal differences in recycling kinetics of synaptojanin-1 and  
506 endophilin-1 knockout mutants between continuous and pulsed stimulation. Discrepancies in the rate  
507 of recycling may be caused by different degrees of stimulation which trigger distinct routes of SV  
508 retrieval (Watanabe and Boucrot, 2017). Activity-dependent bulk endocytosis (ADBE) after strong  
509 optogenetic stimulation was shown to occur in *unc-57(e406)* and *unc-26(s1710)* knockout mutants and  
510 may be the main pathway of retrieval after continuous stimulation (Kittelmann et al., 2013; Nicholson-  
511 Fish et al., 2016; Yu et al., 2018). Moderate, pulsed stimulation however may trigger other endocytic  
512 mechanisms such as ultrafast and clathrin-mediated endocytosis, which are dependent on endophilin  
513 and synaptojanin (Milosevic et al., 2011; Watanabe et al., 2018). *snt-1(md290)* mutants displayed more  
514 severe recycling defects after strong stimulation, indicating that it is dispensable for recycling at lower  
515 activity. This is in stark contrast to previous results in mammalian hippocampal neurons in which  
516 synaptotagmin-1 promotes slow small-scale endocytosis, while inhibiting bulk retrieval during  
517 sustained neurotransmission (Chen et al., 2022). Although a role of SNT-1 in the slow clathrin-  
518 mediated endocytosis is likely also in *C. elegans* and simply not efficiently reported by pOpsicle, a  
519 role in inhibition of bulk endocytosis might not be conserved between nematodes and mammals.  
520 Previously, *snt-1(md290)* mutants have shown earlier fatigue of postsynaptic currents during strong  
521 optogenetic depolarization of cholinergic motor neurons indicating a compensatory SV recycling  
522 defect during strong sustained neurotransmission (Liewald et al., 2008; Wabnig et al., 2015).

523 Finally, SNG-1::pHluorin can further be used as a sensor for spontaneous neuronal activity and SV  
524 endocytosis in *C. elegans*, independent of optogenetic stimulation (**Fig. S1F**). This opens the way for  
525 multiplexing with other fluorescent reporters of neuronal activity such as genetically-encoded Ca<sup>2+</sup> or  
526 voltage indicators (Dreosti and Lagnado, 2011; Jackson and Burrone, 2016; Azimi Hashemi et al.,  
527 2019). The combination of simultaneous imaging of SV dynamics and membrane potential changes  
528 could help to unravel the complicated interplay of interneurons in the control of locomotion by  
529 differentiating between electrical and chemical transmission.

## 530 **5 Author Contributions**

531 MS, BJ and XZ created plasmids and generated strains. MS performed pOpsicle, cell culture and  
532 contraction assays. MW tested ChrimsonSA in cholinergic neurons. NS and NE generated and tested  
533 ChrimsonSA/pHluorin strains. NR generated primary neuronal cell cultures. MS, BJ and AG designed  
534 and coordinated the study. MS and AG wrote the manuscript. AG supervised the work. All authors  
535 read and approved the final manuscript.

## 536 **6 Funding**

537 This project was funded by Deutsche Forschungsgemeinschaft, Collaborative Research Centre 1080  
538 project B02 (grant DFG CRC1080/B2 to AG).

## 539 **7 Acknowledgments**

540 We are indebted to Franziska Baumbach and Hans-Werner Müller for their expert technical assistance,  
541 and members of the Gottschalk group for critical comments regarding the manuscript. We thank Dennis  
542 Vettkötter for providing MWT software. We also thank Johannes Vierock for providing ChrimsonSA  
543 absorption spectra. We thank Maximilian Bach for advice on RIM experiments, and the  
544 *Caenorhabditis* Genetics Center (CGC), which is funded by the NIH Office of Research Infrastructure  
545 Programs (P40 OD010440), for providing strains.

## 546 **8 References**

- 547 Abraham, C., Hutter, H., Palfreyman, M.T., Spatkowski, G., Weimer, R.M., Windoffer, R., et al.  
548 (2006). Synaptic tetraspan vesicle membrane proteins are conserved but not needed for  
549 synaptogenesis and neuronal function in *Caenorhabditis elegans*. *Proc Natl Acad Sci U S A*  
550 103(21), 8227-8232.
- 551 Alfonso, A., Grundahl, K., Duerr, J.S., Han, H.P., and Rand, J.B. (1993). The *Caenorhabditis elegans*  
552 *unc-17* gene: a putative vesicular acetylcholine transporter. *Science* 261(5121), 617-619.
- 553 Azimi Hashemi, N., Bergs, A.C.F., Schuler, C., Scheiwe, A.R., Steuer Costa, W., Bach, M., et al.  
554 (2019). Rhodopsin-based voltage imaging tools for use in muscles and neurons of  
555 *Caenorhabditis elegans*. *Proc Natl Acad Sci U S A* 116(34), 17051-17060. doi:  
556 10.1073/pnas.1902443116.
- 557 Azimi Hashemi, N., Erbguth, K., Vogt, A., Riemensperger, T., Rauch, E., Woodmansee, D., et al.  
558 (2014). Synthetic retinal analogues modify the spectral and kinetic characteristics of microbial  
559 rhodopsin optogenetic tools. *Nat Commun* 5, 5810. doi: 10.1038/ncomms6810.

## Combining optogenetics with pH-sensitive fluorophores *in vivo*

- 560 Boyden, E.S., Zhang, F., Bamberg, E., Nagel, G., and Deisseroth, K. (2005). Millisecond-timescale,  
561 genetically targeted optical control of neural activity. *Nat Neurosci* 8(9), 1263-1268. doi:  
562 10.1038/nn1525.
- 563 Brenner, S. (1974). The genetics of *Caenorhabditis elegans*. *Genetics* 77(1), 71-94. doi:  
564 10.1093/genetics/77.1.71.
- 565 Chanaday, N.L., Cousin, M.A., Milosevic, I., Watanabe, S., and Morgan, J.R. (2019). The Synaptic  
566 Vesicle Cycle Revisited: New Insights into the Modes and Mechanisms. *J Neurosci* 39(42),  
567 8209-8216. doi: 10.1523/JNEUROSCI.1158-19.2019.
- 568 Chang, R.B. (2019). Optogenetic Control of the Peripheral Nervous System. *Cold Spring Harb*  
569 *Perspect Med* 9(12). doi: 10.1101/cshperspect.a034397.
- 570 Chen, Y., Hu, S., Wu, X., Xie, Z., Wang, Y., Wang, B., et al. (2022). Synaptotagmin-1 is a bidirectional  
571 Ca(2+) sensor for neuronal endocytosis. *Proc Natl Acad Sci U S A* 119(20), e2111051119. doi:  
572 10.1073/pnas.2111051119.
- 573 Choi, J.H., Horowitz, L.B., and Ringstad, N. (2021). Opponent vesicular transporters regulate the  
574 strength of glutamatergic neurotransmission in a *C. elegans* sensory circuit. *Nat Commun* 12(1),  
575 6334. doi: 10.1038/s41467-021-26575-3.
- 576 Christensen, M., Estevez, A., Yin, X., Fox, R., Morrison, R., McDonnell, M., et al. (2002). A primary  
577 culture system for functional analysis of *C. elegans* neurons and muscle cells. *Neuron* 33(4),  
578 503-514. doi: 10.1016/s0896-6273(02)00591-3.
- 579 Dittman, J.S., and Kaplan, J.M. (2006). Factors regulating the abundance and localization of  
580 synaptobrevin in the plasma membrane. *Proc Natl Acad Sci U S A* 103(30), 11399-11404.
- 581 Dreosti, E., and Lagnado, L. (2011). Optical reporters of synaptic activity in neural circuits. *Exp*  
582 *Physiol* 96(1), 4-12. doi: 10.1113/expphysiol.2009.051953.
- 583 Edelstein, A.D., Tsuchida, M.A., Amodaj, N., Pinkard, H., Vale, R.D., and Stuurman, N. (2014).  
584 Advanced methods of microscope control using muManager software. *J Biol Methods* 1(2).  
585 doi: 10.14440/jbm.2014.36.
- 586 Egashira, Y., Takase, M., and Takamori, S. (2015). Monitoring of vacuolar-type H<sup>+</sup> ATPase-mediated  
587 proton influx into synaptic vesicles. *J Neurosci* 35(8), 3701-3710. doi:  
588 10.1523/JNEUROSCI.4160-14.2015.
- 589 Fire, A. (1986). Integrative transformation of *Caenorhabditis elegans*. *EMBO J* 5(10), 2673-2680. doi:  
590 10.1002/j.1460-2075.1986.tb04550.x.
- 591 Gan, Q., and Watanabe, S. (2018). Synaptic Vesicle Endocytosis in Different Model Systems. *Front*  
592 *Cell Neurosci* 12, 171. doi: 10.3389/fncel.2018.00171.
- 593 Gowrisankaran, S., and Milosevic, I. (2020). Regulation of synaptic vesicle acidification at the  
594 neuronal synapse. *IUBMB Life* 72(4), 568-576. doi: 10.1002/iub.2235.
- 595 Guo, Z.V., Hart, A.C., and Ramanathan, S. (2009). Optical interrogation of neural circuits in  
596 *Caenorhabditis elegans*. *Nat Methods* 6(12), 891-896. doi: 10.1038/nmeth.1397.
- 597 Guru, A., Post, R.J., Ho, Y.Y., and Warden, M.R. (2015). Making Sense of Optogenetics. *Int J*  
598 *Neuropsychopharmacol* 18(11), pyv079. doi: 10.1093/ijnp/pyv079.
- 599 Hammond-Weinberger, D.R., Wang, Y., Glavis-Bloom, A., and Spitzer, N.C. (2020). Mechanism for  
600 neurotransmitter-receptor matching. *Proc Natl Acad Sci U S A* 117(8), 4368-4374. doi:  
601 10.1073/pnas.1916600117.

- 602 Harris, T.W., Hartweg, E., Horvitz, H.R., and Jorgensen, E.M. (2000). Mutations in synaptojanin  
603 disrupt synaptic vesicle recycling. *J Cell Biol* 150(3), 589-600.
- 604 Hawk, J.D., Wisdom, E.M., Sengupta, T., Kashlan, Z.D., and Colon-Ramos, D.A. (2021). A genetically  
605 encoded tool for reconstituting synthetic modulatory neurotransmission and reconnect neural  
606 circuits in vivo. *Nat Commun* 12(1), 4795. doi: 10.1038/s41467-021-24690-9.
- 607 Heuser, J.E., and Reese, T.S. (1973). Evidence for recycling of synaptic vesicle membrane during  
608 transmitter release at the frog neuromuscular junction. *J Cell Biol* 57(2), 315-344. doi:  
609 10.1083/jcb.57.2.315.
- 610 Jackson, R.E., and Burrone, J. (2016). Visualizing Presynaptic Calcium Dynamics and Vesicle Fusion  
611 with a Single Genetically Encoded Reporter at Individual Synapses. *Front Synaptic Neurosci*  
612 8, 21. doi: 10.3389/fnsyn.2016.00021.
- 613 Jorgensen, E.M., Hartweg, E., Schuske, K., Nonet, M.L., Jin, Y., and Horvitz, H.R. (1995). Defective  
614 recycling of synaptic vesicles in synaptotagmin mutants of *Caenorhabditis elegans*. *Nature*  
615 378(6553), 196-199.
- 616 Kittelmann, M., Liewald, J.F., Hegemann, J., Schultheis, C., Brauner, M., Steuer Costa, W., et al.  
617 (2013). In vivo synaptic recovery following optogenetic hyperstimulation. *Proc Natl Acad Sci*  
618 *U S A* 110(32), E3007-3016. doi: 10.1073/pnas.1305679110.
- 619 Koudelka, S., Voas, M.G., Almeida, R.G., Baraban, M., Soetaert, J., Meyer, M.P., et al. (2016).  
620 Individual Neuronal Subtypes Exhibit Diversity in CNS Myelination Mediated by Synaptic  
621 Vesicle Release. *Curr Biol* 26(11), 1447-1455. doi: 10.1016/j.cub.2016.03.070.
- 622 Lambert, T.J. (2019). FPbase: a community-editable fluorescent protein database. *Nat Methods* 16(4),  
623 277-278. doi: 10.1038/s41592-019-0352-8.
- 624 Li, H., Datunashvili, M., Reyes, R.C., and Voglmaier, S.M. (2022). Inositol hexakisphosphate kinases  
625 differentially regulate trafficking of vesicular glutamate transporters 1 and 2. *Front Cell*  
626 *Neurosci* 16, 926794. doi: 10.3389/fncel.2022.926794.
- 627 Li, Y., and Tsien, R.W. (2012). pHTomato, a red, genetically encoded indicator that enables multiplex  
628 interrogation of synaptic activity. *Nat Neurosci* 15(7), 1047-1053. doi: 10.1038/nn.3126.
- 629 Li, Z., Zhou, J., Wani, K., Yu, T., Ronan, E.A., Piggott, B.J., et al. (2020). A *C. elegans* neuron both  
630 promotes and suppresses motor behavior to fine tune motor output. *bioRxiv*,  
631 2020.2011.2002.354472. doi: 10.1101/2020.11.02.354472.
- 632 Liewald, J.F., Brauner, M., Stephens, G.J., Bouhours, M., Schultheis, C., Zhen, M., et al. (2008).  
633 Optogenetic analysis of synaptic function. *Nat Methods* 5(10), 895-902. doi:  
634 10.1038/nmeth.1252.
- 635 Liu, A., Huang, X., He, W., Xue, F., Yang, Y., Liu, J., et al. (2021). pHmScarlet is a pH-sensitive red  
636 fluorescent protein to monitor exocytosis docking and fusion steps. *Nat Commun* 12(1), 1413.  
637 doi: 10.1038/s41467-021-21666-7.
- 638 Liu, H., Li, L., Wang, W., Gong, J., Yang, X., and Hu, Z. (2018). Spontaneous Vesicle Fusion Is  
639 Differentially Regulated at Cholinergic and GABAergic Synapses. *Cell Rep* 22(9), 2334-2345.  
640 doi: 10.1016/j.celrep.2018.02.023.

- 641 Liu, Q., Sinnen, B.L., Boxer, E.E., Schneider, M.W., Grybko, M.J., Buchta, W.C., et al. (2019). A  
642 Photoactivatable Botulinum Neurotoxin for Inducible Control of Neurotransmission. *Neuron*  
643 101(5), 863-875 e866. doi: 10.1016/j.neuron.2019.01.002.
- 644 Luo, J.K., Melland, H., Nithianantharajah, J., and Gordon, S.L. (2021). Postsynaptic Neuroligin-1  
645 Mediates Presynaptic Endocytosis During Neuronal Activity. *Front Mol Neurosci* 14, 744845.  
646 doi: 10.3389/fnmol.2021.744845.
- 647 Miesenbock, G., De Angelis, D.A., and Rothman, J.E. (1998). Visualizing secretion and synaptic  
648 transmission with pH-sensitive green fluorescent proteins. *Nature* 394(6689), 192-195. doi:  
649 10.1038/28190.
- 650 Miller, K.G., Alfonso, A., Nguyen, M., Crowell, J.A., Johnson, C.D., and Rand, J.B. (1996). A genetic  
651 selection for *Caenorhabditis elegans* synaptic transmission mutants. *Proc Natl Acad Sci U S A*  
652 93(22), 12593-12598.
- 653 Milosevic, I., Giovedi, S., Lou, X., Raimondi, A., Collesi, C., Shen, H., et al. (2011). Recruitment of  
654 endophilin to clathrin-coated pit necks is required for efficient vesicle uncoating after fission.  
655 *Neuron* 72(4), 587-601. doi: 10.1016/j.neuron.2011.08.029.
- 656 Mochida, S. (2022). Mechanisms of Synaptic Vesicle Exo- and Endocytosis. *Biomedicines* 10(7). doi:  
657 10.3390/biomedicines10071593.
- 658 Morton, A., Marland, J.R., and Cousin, M.A. (2015). Synaptic vesicle exocytosis and increased  
659 cytosolic calcium are both necessary but not sufficient for activity-dependent bulk endocytosis.  
660 *J Neurochem* 134(3), 405-415. doi: 10.1111/jnc.13132.
- 661 Nagel, G., Brauner, M., Liewald, J.F., Adeishvili, N., Bamberg, E., and Gottschalk, A. (2005). Light  
662 activation of channelrhodopsin-2 in excitable cells of *Caenorhabditis elegans* triggers rapid  
663 behavioral responses. *Curr Biol* 15(24), 2279-2284.
- 664 Nagel, G., Szellas, T., Huhn, W., Kateriya, S., Adeishvili, N., Berthold, P., et al. (2003).  
665 Channelrhodopsin-2, a directly light-gated cation-selective membrane channel. *Proc Natl Acad*  
666 *Sci U S A* 100(24), 13940-13945.
- 667 Nicholson-Fish, J.C., Smillie, K.J., and Cousin, M.A. (2016). Monitoring activity-dependent bulk  
668 endocytosis with the genetically-encoded reporter VAMP4-pHluorin. *J Neurosci Methods* 266,  
669 1-10. doi: 10.1016/j.jneumeth.2016.03.011.
- 670 Nonet, M.L., Saifee, O., Zhao, H., Rand, J.B., and Wei, L. (1998). Synaptic transmission deficits in  
671 *Caenorhabditis elegans* synaptobrevin mutants. *J Neurosci* 18(1), 70-80.
- 672 Oda, K., Vierock, J., Oishi, S., Rodriguez-Rozada, S., Taniguchi, R., Yamashita, K., et al. (2018).  
673 Crystal structure of the red light-activated channelrhodopsin Chrimson. *Nat Commun* 9(1),  
674 3949. doi: 10.1038/s41467-018-06421-9.
- 675 Piggott, B.J., Liu, J., Feng, Z., Wescott, S.A., and Xu, X.Z. (2011). The neural circuits and synaptic  
676 mechanisms underlying motor initiation in *C. elegans*. *Cell* 147(4), 922-933. doi:  
677 10.1016/j.cell.2011.08.053.
- 678 Poskanzer, K.E., Marek, K.W., Sweeney, S.T., and Davis, G.W. (2003). Synaptotagmin I is necessary  
679 for compensatory synaptic vesicle endocytosis *in vivo*. *Nature* 426(6966), 559-563. doi:  
680 10.1038/nature02184.
- 681 Preibisch, S., Saalfeld, S., and Tomancak, P. (2009). Globally optimal stitching of tiled 3D microscopic  
682 image acquisitions. *Bioinformatics* 25(11), 1463-1465. doi: 10.1093/bioinformatics/btp184.



## Combining optogenetics with pH-sensitive fluorophores *in vivo*

- 683 Sankaranarayanan, S., De Angelis, D., Rothman, J.E., and Ryan, T.A. (2000). The use of pHluorins  
684 for optical measurements of presynaptic activity. *Biophys J* 79(4), 2199-2208. doi:  
685 10.1016/S0006-3495(00)76468-X.
- 686 Schild, L.C., and Glauser, D.A. (2015). Dual Color Neural Activation and Behavior Control with  
687 Chrimson and CoChR in *Caenorhabditis elegans*. *Genetics* 200(4), 1029-1034. doi:  
688 10.1534/genetics.115.177956.
- 689 Schindelin, J., Arganda-Carreras, I., Frise, E., Kaynig, V., Longair, M., Pietzsch, T., et al. (2012). Fiji:  
690 an open-source platform for biological-image analysis. *Nat Methods* 9(7), 676-682. doi:  
691 10.1038/nmeth.2019.
- 692 Schuske, K.R., Richmond, J.E., Matthies, D.S., Davis, W.S., Runz, S., Rube, D.A., et al. (2003).  
693 Endophilin is required for synaptic vesicle endocytosis by localizing synaptojanin. *Neuron*  
694 40(4), 749-762. doi: 10.1016/s0896-6273(03)00667-6.
- 695 Seidenthal, M., Vettkotter, D., and Gottschalk, A. (2022). WormRuler: A software to track body length  
696 used to characterize a super red-shifted channelrhodopsin in *Caenorhabditis elegans*.  
697 *MicroPubl Biol* 2022. doi: 10.17912/micropub.biology.000607.
- 698 Seitz, K.J., and Rizzoli, S.O. (2019). GFP nanobodies reveal recently-exocytosed pHluorin molecules.  
699 *Sci Rep* 9(1), 7773. doi: 10.1038/s41598-019-44262-8.
- 700 Shen, Y., Rosendale, M., Campbell, R.E., and Perrais, D. (2014). pHuji, a pH-sensitive red fluorescent  
701 protein for imaging of exo- and endocytosis. *J Cell Biol* 207(3), 419-432. doi:  
702 10.1083/jcb.201404107.
- 703 Shin, W., Wei, L., Arpino, G., Ge, L., Guo, X., Chan, C.Y., et al. (2021). Preformed Omega-profile  
704 closure and kiss-and-run mediate endocytosis and diverse endocytic modes in neuroendocrine  
705 chromaffin cells. *Neuron* 109(19), 3119-3134 e3115. doi: 10.1016/j.neuron.2021.07.019.
- 706 Sieburth, D., Ch'ng, Q., Dybbs, M., Tavazoie, M., Kennedy, S., Wang, D., et al. (2005). Systematic  
707 analysis of genes required for synapse structure and function. *Nature* 436(7050), 510-517. doi:  
708 10.1038/nature03809.
- 709 Sordillo, A., and Bargmann, C.I. (2021). Behavioral control by depolarized and hyperpolarized states  
710 of an integrating neuron. *Elife* 10. doi: 10.7554/eLife.67723.
- 711 Steuer Costa, W., Yu, S.C., Liewald, J.F., and Gottschalk, A. (2017). Fast cAMP Modulation of  
712 Neurotransmission via Neuropeptide Signals and Vesicle Loading. *Curr Biol* 27(4), 495-507.  
713 doi: 10.1016/j.cub.2016.12.055.
- 714 Strange, K., Christensen, M., and Morrison, R. (2007). Primary culture of *Caenorhabditis elegans*  
715 developing embryo cells for electrophysiological, cell biological and molecular studies. *Nat*  
716 *Protoc* 2(4), 1003-1012. doi: 10.1038/nprot.2007.143.
- 717 Subramanian, J., and Morozov, A. (2011). Erk1/2 inhibit synaptic vesicle exocytosis through L-type  
718 calcium channels. *J Neurosci* 31(12), 4755-4764. doi: 10.1523/JNEUROSCI.6594-10.2011.
- 719 Sudhof, T.C. (2013). Neurotransmitter release: the last millisecond in the life of a synaptic vesicle.  
720 *Neuron* 80(3), 675-690. doi: 10.1016/j.neuron.2013.10.022.
- 721 Swierczek, N.A., Giles, A.C., Rankin, C.H., and Kerr, R.A. (2011). High-throughput behavioral  
722 analysis in *C. elegans*. *Nat Methods* 8(7), 592-598. doi: 10.1038/nmeth.1625.

## Combining optogenetics with pH-sensitive fluorophores *in vivo*

- 723 Ventimiglia, D., and Bargmann, C.I. (2017). Diverse modes of synaptic signaling, regulation, and  
724 plasticity distinguish two classes of *C. elegans* glutamatergic neurons. *Elife* 6. doi:  
725 10.7554/eLife.31234.
- 726 Vettkötter, D., Schneider, M., Liewald, J., Zeiler, S., Guldán, J., Watanabe, S., et al. (2022). Rapid and  
727 reversible optogenetic silencing of synaptic transmission by clustering of synaptic vesicles.  
728 *bioRxiv*, 2022.2006.2013.495966. doi: 10.1101/2022.06.13.495966.
- 729 Vierock, J., Rodriguez-Rozada, S., Dieter, A., Pieper, F., Sims, R., Tenedini, F., et al. (2021). BiPOLES  
730 is an optogenetic tool developed for bidirectional dual-color control of neurons. *Nat Commun*  
731 12(1), 4527. doi: 10.1038/s41467-021-24759-5.
- 732 Voglmaier, S.M., Kam, K., Yang, H., Fortin, D.L., Hua, Z., Nicoll, R.A., et al. (2006). Distinct  
733 endocytic pathways control the rate and extent of synaptic vesicle protein recycling. *Neuron*  
734 51(1), 71-84. doi: 10.1016/j.neuron.2006.05.027.
- 735 von Gersdorff, H., and Matthews, G. (1999). Electrophysiology of synaptic vesicle cycling. *Annu Rev*  
736 *Physiol* 61, 725-752. doi: 10.1146/annurev.physiol.61.1.725.
- 737 Wabnig, S., Liewald, J.F., Yu, S.C., and Gottschalk, A. (2015). High-Throughput All-Optical Analysis  
738 of Synaptic Transmission and Synaptic Vesicle Recycling in *Caenorhabditis elegans*. *PLoS One*  
739 10(8), e0135584. doi: 10.1371/journal.pone.0135584.
- 740 Watanabe, S., and Boucrot, E. (2017). Fast and ultrafast endocytosis. *Curr Opin Cell Biol* 47, 64-71.  
741 doi: 10.1016/j.ceb.2017.02.013.
- 742 Watanabe, S., Liu, Q., Davis, M.W., Hollopeter, G., Thomas, N., Jorgensen, N.B., et al. (2013a).  
743 Ultrafast endocytosis at *Caenorhabditis elegans* neuromuscular junctions. *Elife* 2, e00723. doi:  
744 10.7554/eLife.00723.
- 745 Watanabe, S., Mamer, L.E., Raychaudhuri, S., Luvsanjav, D., Eisen, J., Trimbuch, T., et al. (2018).  
746 Synaptotagmin and Endophilin Mediate Neck Formation during Ultrafast Endocytosis. *Neuron*  
747 98(6), 1184-1197 e1186. doi: 10.1016/j.neuron.2018.06.005.
- 748 Watanabe, S., Rost, B.R., Camacho-Perez, M., Davis, M.W., Sohl-Kielczynski, B., Rosenmund, C., et  
749 al. (2013b). Ultrafast endocytosis at mouse hippocampal synapses. *Nature* 504(7479), 242-247.  
750 doi: 10.1038/nature12809.
- 751 Yao, C.K., Liu, Y.T., Lee, I.C., Wang, Y.T., and Wu, P.Y. (2017). A Ca<sup>2+</sup> channel differentially  
752 regulates Clathrin-mediated and activity-dependent bulk endocytosis. *PLoS Biol* 15(4),  
753 e2000931. doi: 10.1371/journal.pbio.2000931.
- 754 Yu, S.C., Janosi, B., Liewald, J.F., Wabnig, S., and Gottschalk, A. (2018). Endophilin A and B Join  
755 Forces With Clathrin to Mediate Synaptic Vesicle Recycling in *Caenorhabditis elegans*. *Front*  
756 *Mol Neurosci* 11, 196. doi: 10.3389/fnmol.2018.00196.
- 757 Yu, S.C., Klosterman, S.M., Martin, A.A., Gracheva, E.O., and Richmond, J.E. (2013). Differential  
758 roles for snapin and synaptotagmin in the synaptic vesicle cycle. *PLoS One* 8(2), e57842. doi:  
759 10.1371/journal.pone.0057842.
- 760 Zhang, L., Wang, Y., Dong, Y., Pant, A., Liu, Y., Masserman, L., et al. (2022). The endophilin  
761 curvature-sensitive motif requires electrostatic guidance to recycle synaptic vesicles *in vivo*.  
762 *Dev Cell* 57(6), 750-766 e755. doi: 10.1016/j.devcel.2022.02.021.
- 763 Zhang, S., Banerjee, D., and Kuhn, J.R. (2011). Isolation and culture of larval cells from *C. elegans*.  
764 *PLoS One* 6(4), e19505. doi: 10.1371/journal.pone.0019505.

**Combining optogenetics with pH-sensitive fluorophores *in vivo***

765 Zhao, H., and Nonet, M.L. (2001). A conserved mechanism of synaptogyrin localization. *Mol Biol Cell*  
766 12(8), 2275-2289. doi: 10.1091/mbc.12.8.2275.

767 Zhu, Y., Xu, J., and Heinemann, S.F. (2009). Two pathways of synaptic vesicle retrieval revealed by  
768 single-vesicle imaging. *Neuron* 61(3), 397-411.

769

770 **Table 1: *C. elegans* strains**

| Strain | Genotype                                                                                                  | Source                       |
|--------|-----------------------------------------------------------------------------------------------------------|------------------------------|
| ZX214  | <i>snt-1(md290)</i>                                                                                       | CGC (Jorgensen et al., 1995) |
| ZX307  | <i>snb-1(md247)</i>                                                                                       | CGC (Miller et al., 1996)    |
| ZX451  | <i>unc-57(e406)</i>                                                                                       | CGC (Brenner, 1974)          |
| ZX1629 | <i>unc-26(s1710)</i>                                                                                      | CGC (Harris et al., 2000)    |
| ZX2835 | <i>sng-1(ok234); zxis138[punc-17::sng-1-pHuji, punc-17::Chr2(H134R)::myc, pmyo-2::CFP]</i>                | This study                   |
| ZX2836 | <i>unc-26(s1710); sng-1(ok234); zxis138[punc-17::sng-1-pHuji, punc-17::Chr2(H134R)::myc, pmyo-2::CFP]</i> | This study                   |
| ZX2837 | <i>snt-1(md290); sng-1(ok234); zxis138[punc-17::sng-1-pHuji, punc-17::Chr2(H134R)::myc, pmyo-2::CFP]</i>  | This study                   |
| ZX2838 | <i>unc-57(e406); sng-1(ok234); zxis138[punc-17::sng-1-pHuji, punc-17::Chr2(H134R)::myc, pmyo-2::CFP]</i>  | This study                   |
| ZX2850 | <i>snb-1(md247); sng-1(ok234); zxis138[punc-17::sng-1-pHuji, punc-17::Chr2(H134R)::myc, pmyo-2::CFP]</i>  | This study                   |
| ZX3197 | <i>zxis152[punc-17::Chrimson(S169A); punc-17::pHluorin; pmyo-2::mCherry]</i>                              | This study                   |
| ZX3217 | <i>unc-26(s1710); zxis152[punc-17::Chrimson(S169A); punc-17::pHluorin; pmyo-2::mCherry]</i>               | This study                   |

## Combining optogenetics with pH-sensitive fluorophores *in vivo*

|        |                                                                                            |            |
|--------|--------------------------------------------------------------------------------------------|------------|
| ZX3218 | <i>snb-1(md247); zxIs152[punc-17::Chrimson(S169A); punc-17::pHluorin; pmyo-2::mCherry]</i> | This study |
| ZX3254 | <i>unc-57(e406); zxIs152[punc-17::Chrimson(S169A); punc-17::pHluorin; pmyo-2::mCherry]</i> | This study |
| ZX3402 | <i>snt-1(md290); zxIs152[punc-17::Chrimson(S169A); punc-17::pHluorin; pmyo-2::mCherry]</i> | This study |
| ZX3422 | <i>zxEx1418[pmyo-2::mCherry; ptdc-1s::ChrimsonSA; ptdc-1s::SNG-1::pHluorin]</i>            | This study |

771

772 **Fig. 1. Depolarization of cholinergic motor neurons with ChR2 triggers fusion of SVs containing**  
773 **SNG-1::pHuji.** (A) Schematic of the pOpsicle assay, showing the SV cycle and transfer of pH-  
774 sensitive fluorescent proteins fused to SNG-1 in response to optogenetic stimulation. (B) Relative  
775 excitation and emission spectra of ChR2 and pHuji, normalized to the maximum absorption/emission  
776 amplitude. (C) Representative image of *C. elegans* expressing SNG-1::pHuji in cholinergic neurons.  
777 Arrows: Ventral location of cell bodies of A- and B-type motor neurons. Arrowhead: cholinergic  
778 neurons within the head ganglia. 40 x magnification. Scale bar, 50  $\mu$ m. (D) Enlarged view of the dorsal  
779 nerve cord (DNC) in (C). Arrows: fluorescent puncta, representing SV clouds and neuronal plasma  
780 membrane. Scale bar, 10  $\mu$ m. (E) Mean relative body length ( $\pm$  SEM) of animals expressing ChR2 and  
781 pHuji, optionally treated with ATR (as indicated), normalized to the average body length before  
782 stimulation. A 10 s continuous light pulse (470 nm, 1 mW/mm<sup>2</sup>) was applied after 5 s (indicated by the  
783 blue bar). Number of animals indicated (n), accumulated from N = 3 biological replicates. (F) Mean  
784 ( $\pm$  SEM) relative change of DNC fluorescence of animals treated with and without ATR, before and  
785 after a 10 s continuous light pulse (460 nm, 0.34 mW/mm<sup>2</sup>), applied after 10 s (note, fluorescence of  
786 pHuji cannot be properly imaged during blue light pulse, due to photoswitching). Number of animals  
787 indicated (n), accumulated from N = 2 biological replicates.

788 **Fig. 2. pHuji fluorescence signal increase is affected by mutation of *snb-1(md247)* in pOpsicle**  
789 **assays.** (A, C, D, E) Mean ( $\pm$  SEM) DNC fluorescence of wild type and mutant animals treated with  
790 ATR, and expressing ChR2 and SNG-1::pHuji in cholinergic motor neurons. A 10 s continuous light  
791 pulse (460 nm, 0.34 mW/mm<sup>2</sup>, indicated by blue bar) was applied after 10 s. Number of animals is  
792 indicated (n), accumulated from N = 3 biological replicates. (B) Fluorescent signal of individual wild  
793 type and *snb-1(md247)* animals, as analyzed in (A), immediately following the end of the stimulation  
794 (20 – 21 s). Mean ( $\pm$  SEM). Unpaired *t*-Test; statistically significant difference is indicated as \*\*\**p* <  
795 0.001. (F - H) Calculated fluorescence decay constants of single animals using a one-phase exponential  
796 fit after stimulation (20 – 90 s). Median with interquartile range. Mann-Whitney test (ns, not  
797 significant, *p* > 0.05). In C – H, only animals showing a decay of fluorescence after stimulation were  
798 taken into consideration (wild type: 45 of 47 animals, *unc-26(s1710)*: 16 of 18, *unc-57(e406)*: 17 of  
799 17, *snt-1(md290)*: 11 of 13).

800 **Fig. 3. Combining ChrimsonSA with pHluorin ('green pOpsicle') for stimulation and**  
801 **visualization of exo- and endocytosis.** (A) Relative excitation and emission spectra of ChrimsonSA  
802 and super-ecliptic pHluorin, normalized to the maximum absorption/emission amplitude. (B)

## Combining optogenetics with pH-sensitive fluorophores *in vivo*

803 Representative image of *C. elegans* expressing SNG-1::pHluorin in cholinergic neurons. Arrows: Cell  
804 bodies of A- and B-type motor neurons (ventral nerve cord). Arrowhead: cholinergic neurons in the  
805 head ganglia. 40 x magnification. Scale bar, 50  $\mu\text{m}$ . (C) Enlarged view of the DNC in (B). Arrows:  
806 fluorescent puncta, representing en passant synaptic terminals. Scale bar, 10  $\mu\text{m}$ . (D) Primary neuronal  
807 cell culture derived from *C. elegans* embryos, mean ( $\pm$  SEM) normalized change of pHluorin  
808 fluorescence in neurite extensions.  $\text{NH}_4\text{Cl}$  containing solution (HEPES buffered,  $\text{pH} = 7.4$ ) was added  
809 after 10 s. MES buffered solution ( $\text{pH} = 5.6$ ) was added after 80 s. Cells were washed with control  
810 saline (HEPES buffered,  $\text{pH} = 7.4$ ) after 125 s. Number of measured neurons is indicated (n),  
811 accumulated from  $N = 2$  biological replicates. (E) Mean relative body length ( $\pm$  SEM) of animals  
812 expressing ChrimsonSA and pHluorin optionally treated with ATR, as indicated, normalized to the  
813 average body length before stimulation. A 10 s continuous light pulse (590 nm,  $1 \text{ mW}/\text{mm}^2$ ; indicated  
814 by red bar) was applied after 5 s. Number of animals (n), accumulated from  $N = 3$  biological replicates.  
815 (F) Representative images of pHluorin fluorescence in the DNC of an animal treated with ATR at  
816 different time points during the pOpsicle assay, as indicated. A 10 s continuous light pulse (590 nm,  
817  $40 \mu\text{W}/\text{mm}^2$ ) was applied after 10 s. The ImageJ Smart Look-Up-Table was used. 100 x magnification.  
818 Scale bar, 5  $\mu\text{m}$ . (G) Kymograph representing the change in fluorescence of the DNC represented in  
819 (F) over a time course of 90 s. The red bar indicates the period of light stimulus. Scale bar, 5  $\mu\text{m}$ . (H)  
820 Representative traces of normalized DNC fluorescence of individual animals with or without ATR. A  
821 10 s continuous light pulse (590 nm,  $40 \mu\text{W}/\text{mm}^2$ ) was applied after 10 s (red bar). (I) Mean ( $\pm$  SEM)  
822 change in DNC fluorescence of animals supplemented with and without ATR. A 10 s continuous light  
823 pulse (590 nm,  $40 \mu\text{W}/\text{mm}^2$ ) was applied after 10 s (red bar). Number of animals (n), accumulated  
824 from  $N = 4$  (+ATR), and  $N = 3$  (-ATR) biological replicates.

825 **Fig. 4. ‘Green’ pOpsicle reports on mutations affecting SV fusion and endocytosis. (A, C, H, M)**  
826 Mean ( $\pm$  SEM) change of fluorescence of SNG-1::pHluorin co-expressed with ChrimsonSA in  
827 cholinergic motor neurons. DNC of wild type and mutant animals, as indicated. A 10 s continuous light  
828 pulse (590 nm,  $40 \mu\text{W}/\text{mm}^2$ ; indicated by a red bar) was applied after 10 s. Number of animals (n),  
829 accumulated from  $N = 4 - 6$  biological replicates. (B, D, I, N) Fluorescent signal of individual wild  
830 type and mutant animals at the end of stimulation (15 – 20 s). Mean ( $\pm$  SEM). Unpaired *t*-Test (\*\* $p <$   
831 0.01, \*\*\* $p <$  0.001). (E, J, O) Calculated fluorescence rise constants of single animals using a one-  
832 phase exponential fit during stimulation (10 – 20 s). Median with interquartile range. Mann-Whitney  
833 test (\*\* $p <$  0.01, \*\*\* $p <$  0.001). (F, K, P) Calculated fluorescence decay constants of single animals  
834 using a one-phase exponential fit after stimulation (20 – 90 s). Median with interquartile range. Mann-  
835 Whitney test (\* $p <$  0.05, \*\* $p <$  0.01). (G, L, Q) Cumulative frequency distribution of  $\tau_{\text{Decay}}$  values  
836 displayed in (E), (I) or (M). In C – N, animals showing an increase  $<$  3 standard deviations during  
837 stimulation, or no decay of fluorescence following stimulation, were excluded (wild type: 14 of 111  
838 animals, *unc-26(s1710)*: 10 of 39, *unc-57(e406)*: 22 of 47, *snt-1(md290)*: 24 of 39).

839 **Fig. 5. Using pulsed, more physiological optogenetic stimulation. (A)** As in Fig. 4, but using 2 Hz  
840 pulsed light stimulation (100 ms pulses, 590 nm,  $40 \mu\text{W}/\text{mm}^2$ , red tick marks) was applied after 10 s  
841 for 10 s. Using this stimulation regime, more animals were excluded from analysis (wild type: 18 of  
842 38 animals, *unc-26(s1710)*: 18 of 30, *unc-57(e406)*: 22 of 33, *snt-1(md290)*: 36 of 54) accumulated  
843 from  $N = 5 - 6$  biological replicates. (B) Fluorescent signal of individual wild type and mutant animals  
844 at the end of stimulation (15 – 20 s). Mean ( $\pm$  SEM). One-way ANOVAs with Dunnett’s correction  
845 (\*\* $p <$  0.001). (C) Calculated fluorescence rise constants of single animals using a one-phase  
846 exponential fit during stimulation (10 – 20 s). Median with interquartile range. Kruskal-Wallis test with  
847 Dunn’s correction (ns  $p >$  0.05, \* $p <$  0.05, \*\* $p <$  0.01). (D) Calculated fluorescence decay constants of  
848 single animals using a one-phase exponential fit after stimulation (20 – 90 s). Median with interquartile

## Combining optogenetics with pH-sensitive fluorophores *in vivo*

849 range. Kruskal-Wallis test with Dunn's correction (ns  $p > 0.05$ , \* $p < 0.05$ , \*\* $p < 0.01$ ). (E) Cumulative  
850 frequency distribution of  $\tau_{\text{Decay}}$  values displayed in (C).

851 **Fig. 6. pOpsicle assay in the RIM interneuron pair.** (A) Representative z-projected image of *C.*  
852 *elegans* expressing SNG-1::pHluorin in RIM neurons using the promotor of *tdc-1*. 40 x magnification.  
853 Scale bar, 5  $\mu\text{m}$ . (B) Mean crawling speed ( $\pm$  SEM) of animals expressing ChrimsonSA and pHluorin  
854 in RIM neurons normalized to the average before the first light pulse. Three 20 s light pulses (623 nm,  
855 400  $\mu\text{W}/\text{mm}^2$ ) were applied at 300 s, 420 s, and 540 s as indicated by red bars. (C) Mean ( $\pm$  SEM)  
856 number of reversals in 10 s intervals. Light stimulation as in (B). In B, C,  $N = 3$  populations of animals  
857 were tested. (D) Representative images acquired at different time points during the pOpsicle assay,  
858 pHluorin fluorescence in RIM neurons, animal treated with ATR. A 10 s continuous light pulse (590  
859 nm, 40  $\mu\text{W}/\text{mm}^2$ ) was applied after 10 s. The ImageJ *Smart Look-Up-Table* was used. 100 x  
860 magnification. Scale bar, 5  $\mu\text{m}$ . (E) Kymograph representing the change in fluorescence in RIM  
861 neurons as shown in (D) over a time course of 90 s. The red bar indicates the period of light stimulus.  
862 Scale bar, 5  $\mu\text{m}$ . (F) Mean ( $\pm$  SEM) pHluorin fluorescence in RIM neurons of animals with and without  
863 ATR. A 10 s continuous light pulse (590 nm, 40  $\mu\text{W}/\text{mm}^2$ ) was applied after 10 s. Number of animals  
864 (n), accumulated from  $N = 5$  (+ATR) or  $N = 4$  (-ATR) biological replicates. (G) Comparison of  
865 fluorescence rise constants of single animals expressing pHluorin and ChrimsonSA in RIM neurons or  
866 in cholinergic neurons, using a one-phase exponential fit during stimulation (10 – 20 s). Median with  
867 interquartile range. Mann-Whitney test (\*\*\*)  $p < 0.001$ . (H) Cumulative frequency distribution of  $\tau_{\text{Rise}}$   
868 values displayed in (G). (I) Comparison of fluorescence decay constants of single animals as in G,  
869 using a one-phase exponential fit after stimulation (20 – 90 s). Median with interquartile range. Mann-  
870 Whitney test (\*\*\*)  $p < 0.001$ . (J) Cumulative frequency distribution of  $\tau_{\text{Decay}}$  values displayed in (I).  
871 (G-J) Only animals showing a strong response during stimulation and a decay of fluorescence after  
872 stimulation were taken into consideration (RIM: 22 of 47 animals, cholinergic neurons: 24 of 27  
873 animals as depicted in Fig. 3).

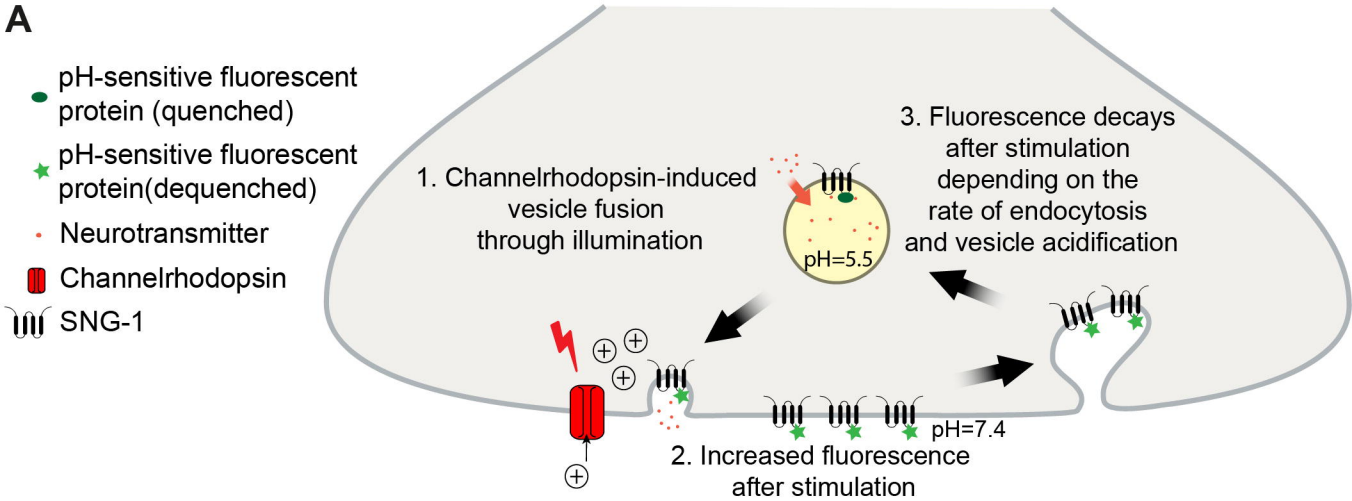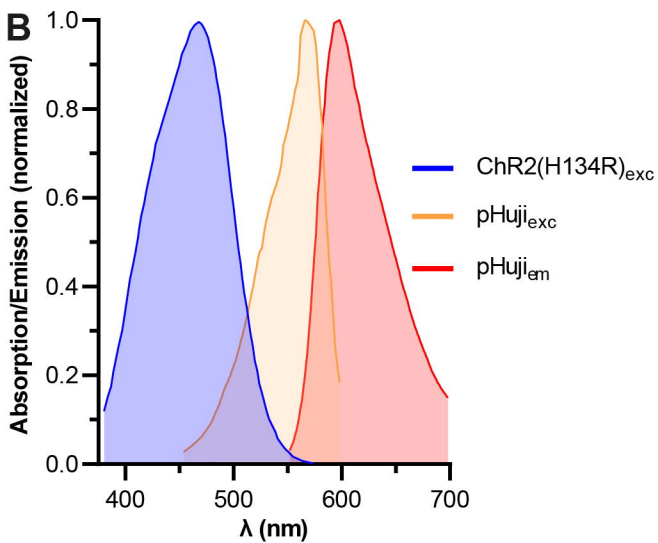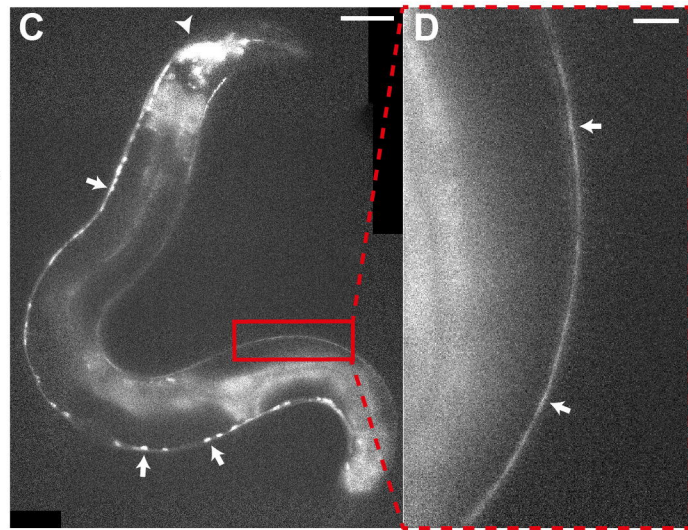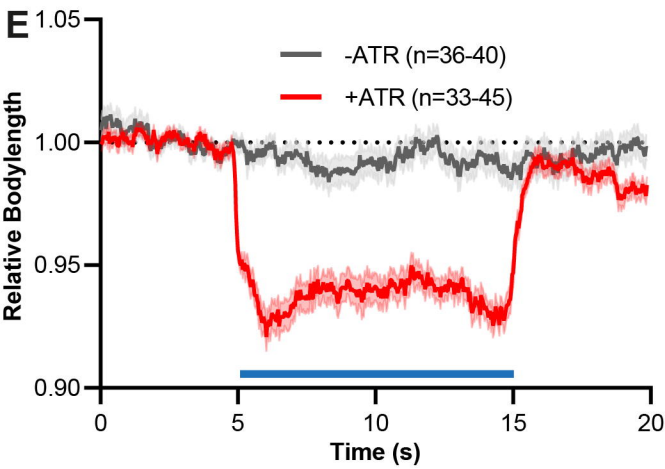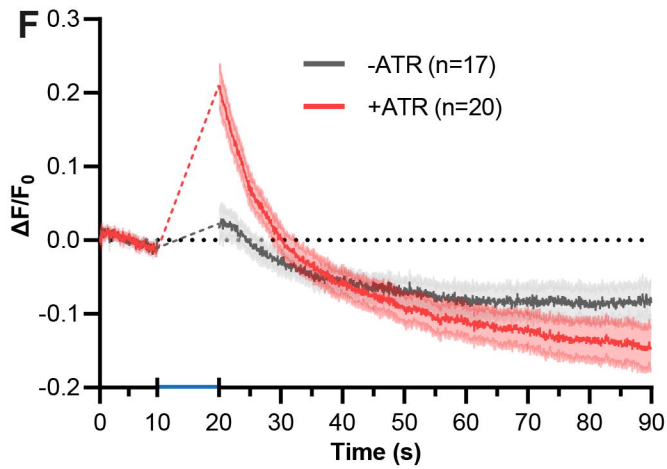

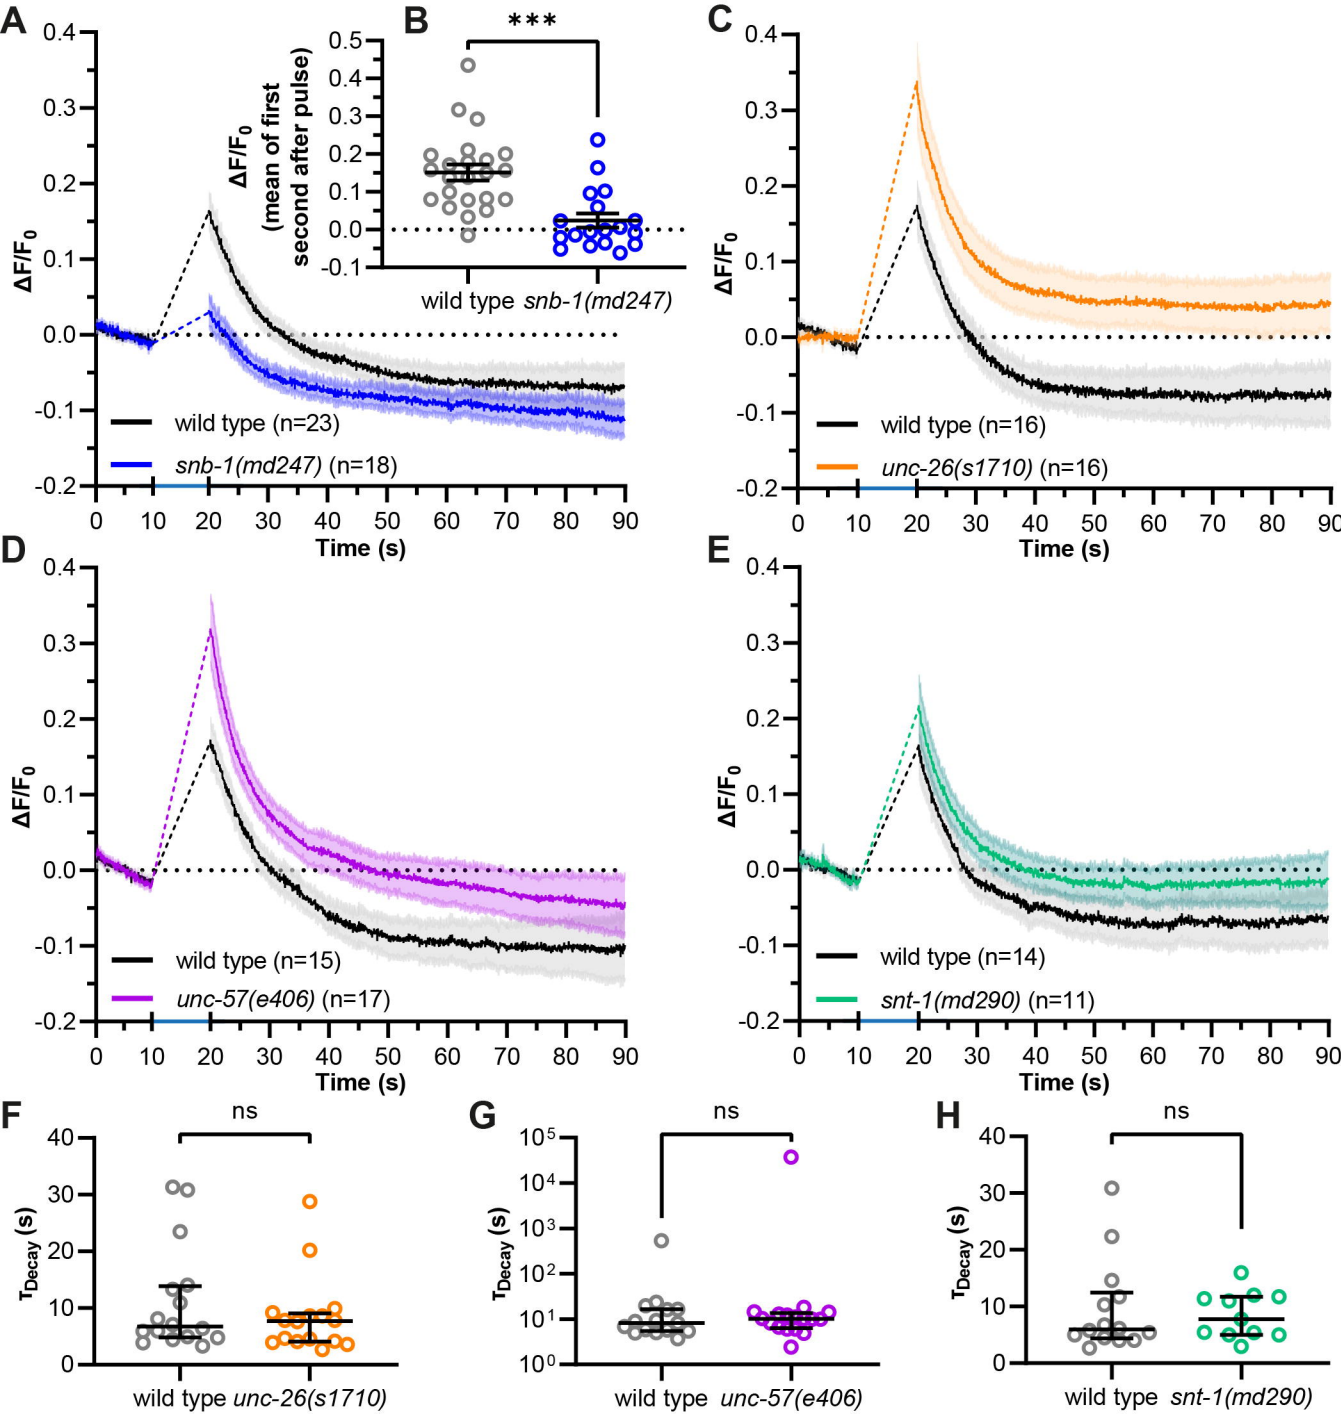



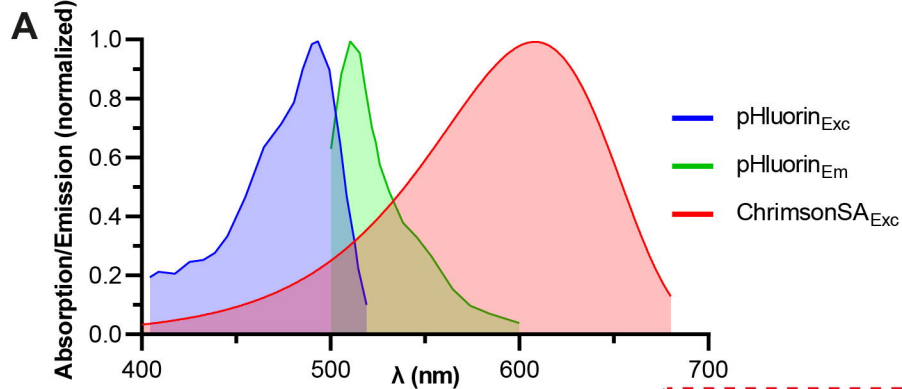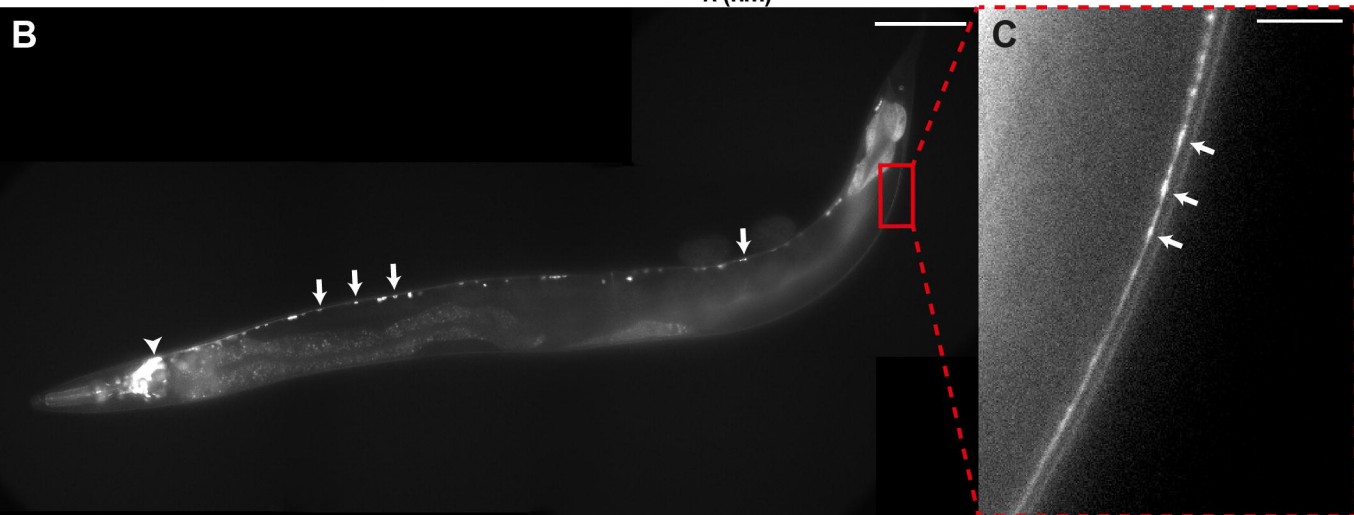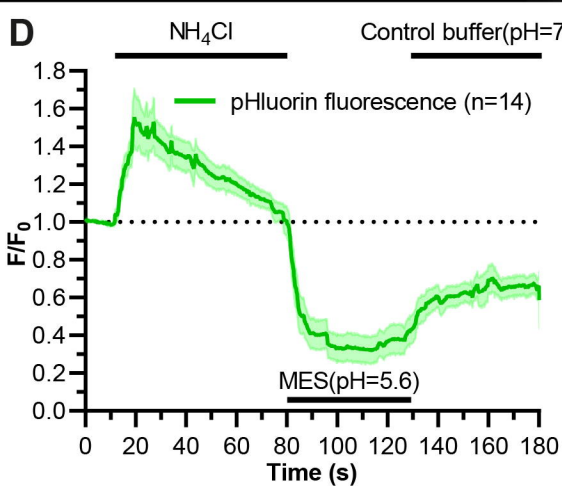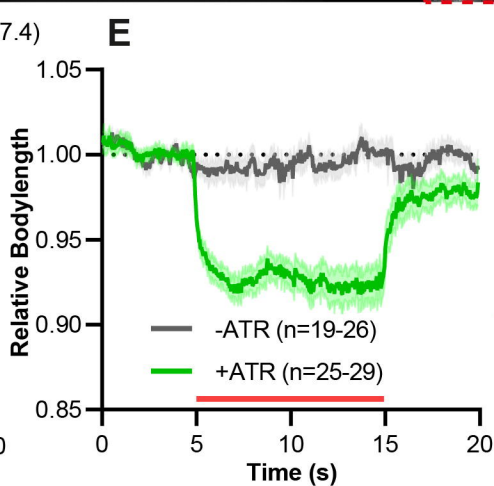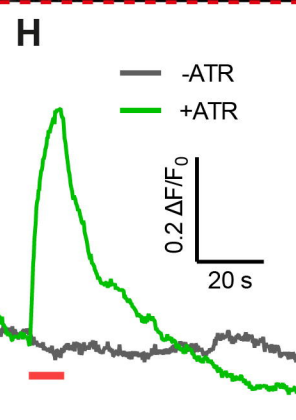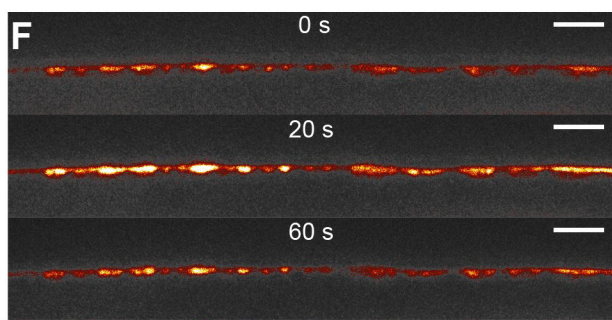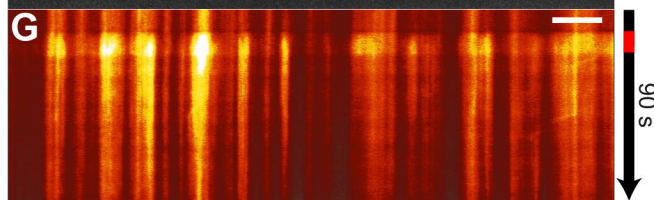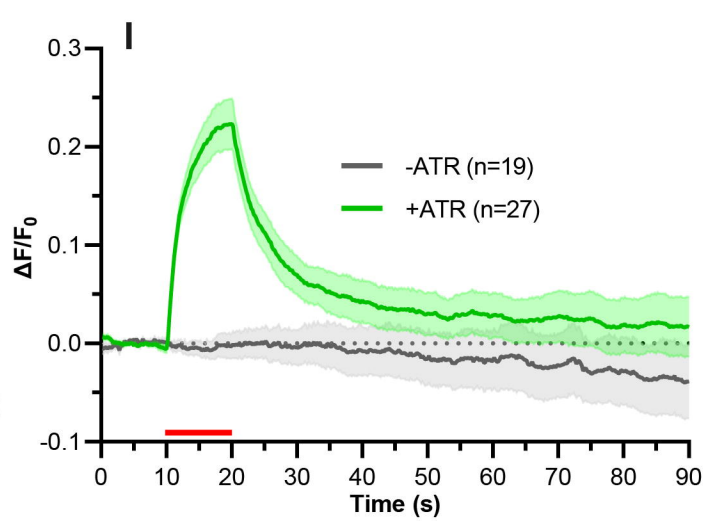

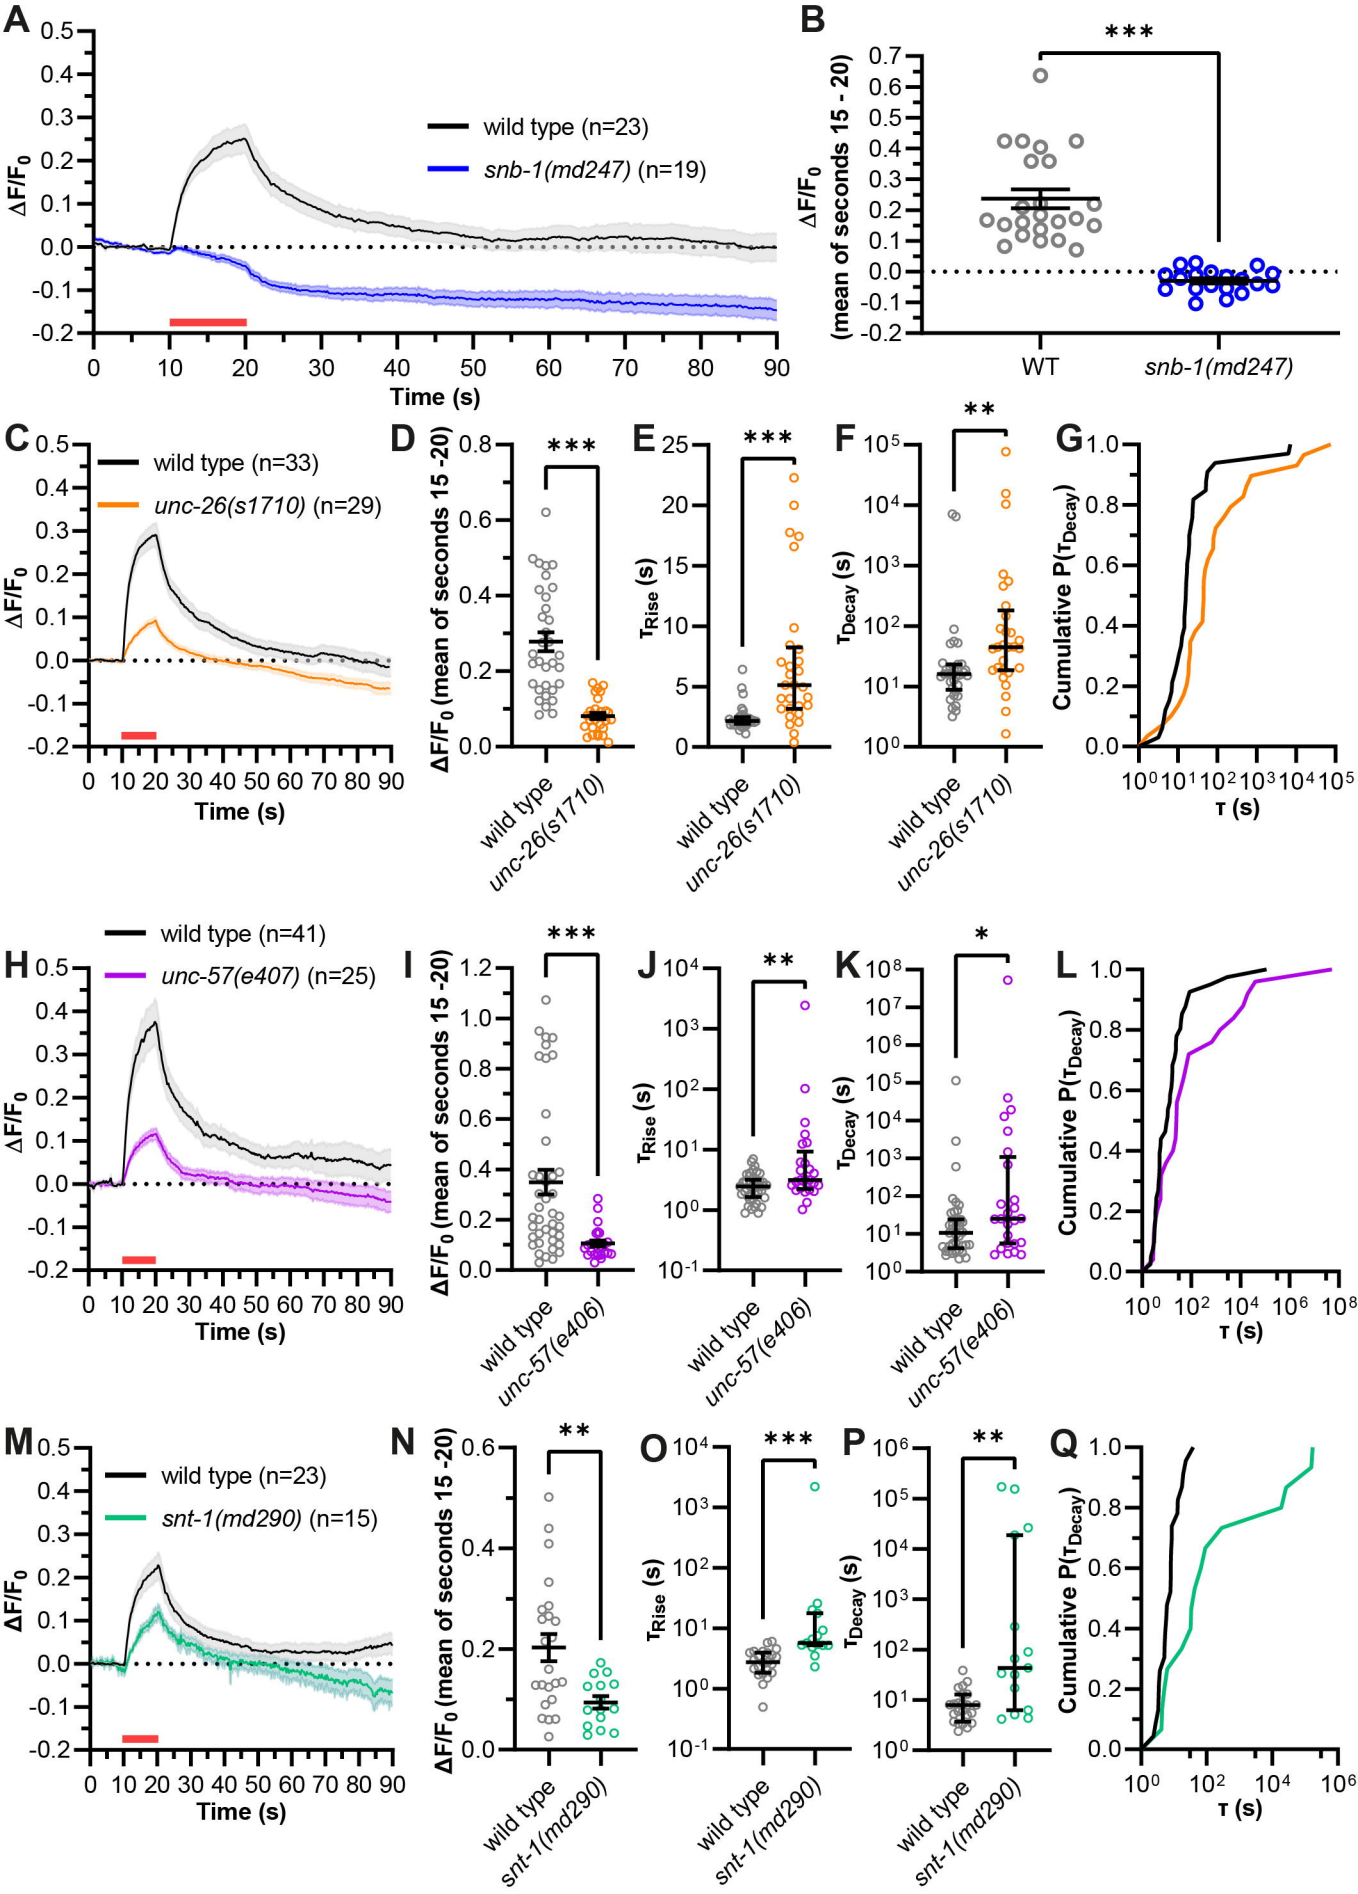

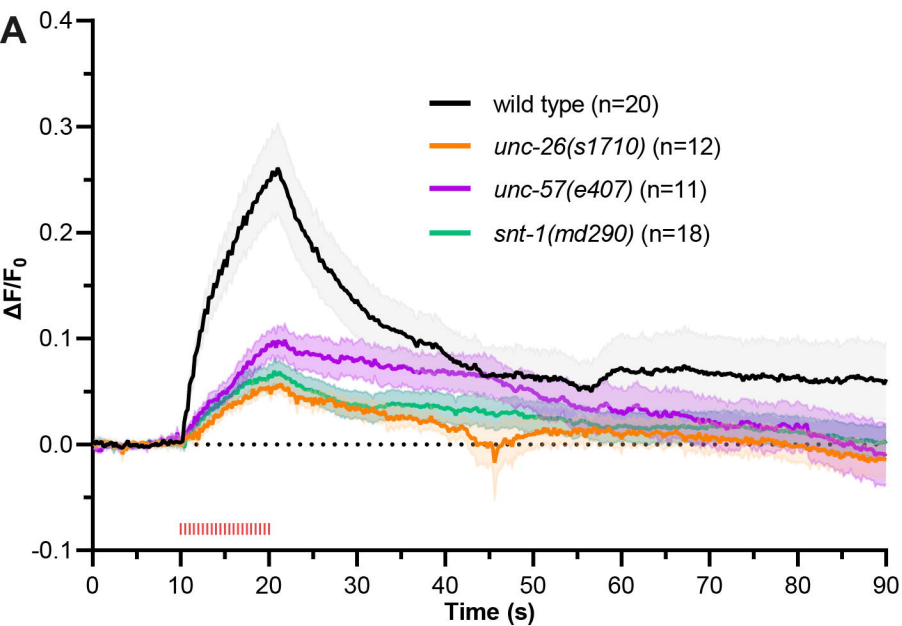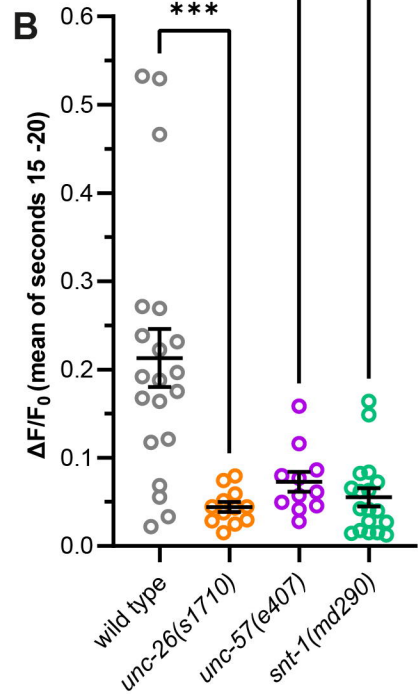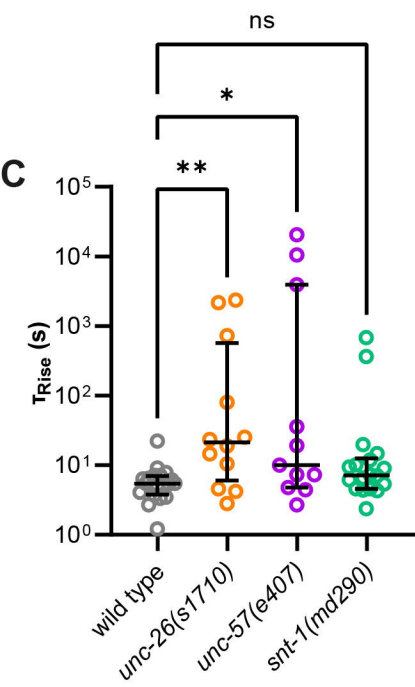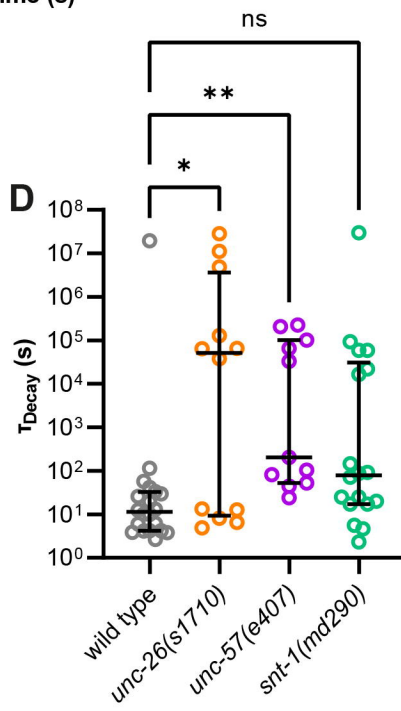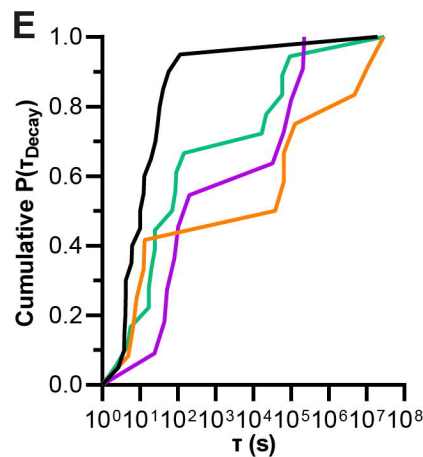

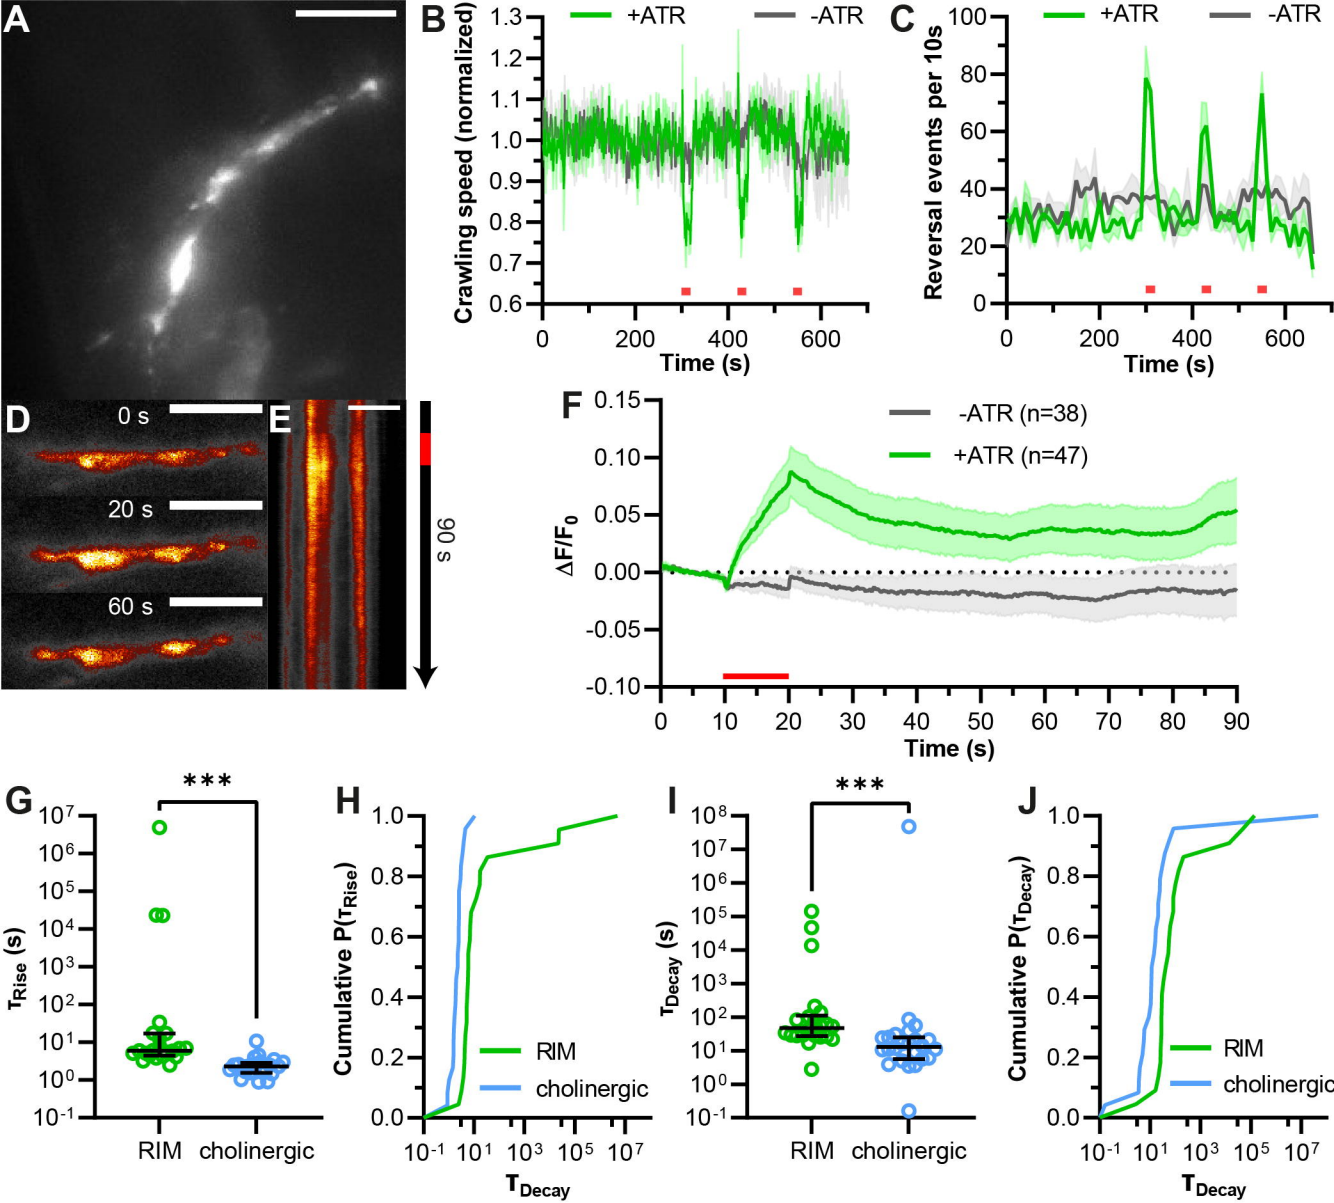

Source: https://www.biorxiv.org/content/10.1101/2022.12.20.521193v1.full.pdf
